# Supplementary material for: A Potentially Practicable Halotolerant Yeast Meyerozyma guilliermondii A4 for Decolorizing and Detoxifying Azo Dyes and Its Possible Halotolerance Mechanisms
Source: MDPI journal article supplement (doi:10.3390/jof9080851), 2023-08-15
Supplement: s1 [file s1]

## **Supporting Information for:**

### **A potentially practicable halotolerant yeast *Meyerozyma guilliermondii* A4 for decolorizing and detoxifying azo dyes and its possible halotolerance mechanisms**

Yue Feng 1,†, Jingru Cui 1,†, Bingwen Xu 2, Yifan Jiang 1, Chunqing Fu 1 and Liang Tan 1,\*

1 Key Laboratory of Plant Biotechnology of Liaoning Province, School of Life Science, Liaoning Normal University, Dalian 116081, China; fss990214@163.com (Y.F.); acui0315@163.com (J.C.); jiangyifan202203@163.com (Y.J.); 15560356752@163.com (C.F.)

2 Dalian Center for Certification and Food and Drug Control, Dalian 116037, China; xubingwen0402@126.com

\* Correspondence: tanliang19811210@163.com or tanliang1210@lnnu.edu.cn; Tel./Fax: +86-411-85827068

† These authors contributed equally to this work.

**This 28-page file includes:**

**3 Supplemental Tables**

**5 Supplemental Figures**

**2 Supplemental Texts**

**4 References**

**Table S1 Azo dyes used in the present study and their main chemical information.**

| Name<br>(CAS number)                           | Chemical structure | Molecular<br>weight | Characteristic<br>absorption<br>wavelength<br>(nm) |
|------------------------------------------------|--------------------|---------------------|----------------------------------------------------|
| Acid Red B<br>(3567-69-9)                      |                    | 458.5               | 516                                                |
| Acid Orange II<br>(633-96-5)                   |                    | 328.3               | 484                                                |
| Acid Scarlet GR<br>(5413-75-2)                 |                    | 512.5               | 511                                                |
| Acid Red 3R<br>(1082572-30-2)                  |                    | 538.5               | 507                                                |
| Reactive Brilliant<br>Red K-2G<br>(12238-01-6) |                    | 788.2               | 509                                                |
| Reactive Violet<br>KN-4R<br>(12226-38-9)       |                    | 669.6               | 558                                                |
| Reactive Yellow 3R<br>(93050-80-7)             |                    | 938.3               | 540                                                |

**Table S2 Sequences of the target genes which were validated through QRT-PCR.**

| Gene ID  | Genetic sequences                                                                                                                                                                                                                                                                                                                                                                                                                                                                                                                                                                                                                                                                                                                                                                                                                                                                                                                                                                                                                                                                                                                                                                                                                                                                                                                                                                                                                                                                                                                                                                                                                                                                                                                                                                                                                                                                                                                                                                                                                                                                                                                                                                                                                                                                                                                                                                                                                                                                                                                                                                                                                                                                                                                                                                                                                                                                                                                                                                                                                                                           |
|----------|-----------------------------------------------------------------------------------------------------------------------------------------------------------------------------------------------------------------------------------------------------------------------------------------------------------------------------------------------------------------------------------------------------------------------------------------------------------------------------------------------------------------------------------------------------------------------------------------------------------------------------------------------------------------------------------------------------------------------------------------------------------------------------------------------------------------------------------------------------------------------------------------------------------------------------------------------------------------------------------------------------------------------------------------------------------------------------------------------------------------------------------------------------------------------------------------------------------------------------------------------------------------------------------------------------------------------------------------------------------------------------------------------------------------------------------------------------------------------------------------------------------------------------------------------------------------------------------------------------------------------------------------------------------------------------------------------------------------------------------------------------------------------------------------------------------------------------------------------------------------------------------------------------------------------------------------------------------------------------------------------------------------------------------------------------------------------------------------------------------------------------------------------------------------------------------------------------------------------------------------------------------------------------------------------------------------------------------------------------------------------------------------------------------------------------------------------------------------------------------------------------------------------------------------------------------------------------------------------------------------------------------------------------------------------------------------------------------------------------------------------------------------------------------------------------------------------------------------------------------------------------------------------------------------------------------------------------------------------------------------------------------------------------------------------------------------------------|
| D_102776 | <p>ATGGCAGAATTTTATAGACACCTTCTTTCCCAGCTCTTATTGTTGGTGCCTGCCTCCAAGTTCCAGCCGCCCTCTTCAGATGACCCAGACCCTCA<br/> CACAGAGGTTATTGACGTAGTTAGTGCAATTCTCGCTGGCAACTCGGGTTCATTTTCACAGATACTAGGTATAAAGGAGTGTTTTACAATGCTA<br/> ATGCTTTACGTGTGTTATCCAGTATCCCAATATAAGCTTGAAGAGTGCATTACACGGCTATGTGGACGAAATTATCAAGTCTGTGGAACAGAGC<br/> TCTTCGACCGATTCTCGACTTTTAGTGCAATTAAGTGAATTTGTCATTGCAATTATTCATCCAGCTCAATTTTACTGGACCAAATGTTGACTTTA<br/> AGGCTCACGAGCTCTTAATGCCCCATGCTGACTACGAAAATTTGCACTTGGACCTCATAGACTTGCTCACC GTTGAGGGGCCAACAGGCATATGA<br/> GCTTATGAATGAACCATTGCTTTTCATTATAGCCAGTTTGATGTTTGAAAAGATTGATGAATGTGGGACCACAGTACTCGTTTATTGGCAAAGATAT<br/> GAACGTAGAGCTTGACCAAATGGTAGAAGCCACTAGACCTTTGGTCGCCAATCCAAGCATAGAAGACGCTTCGCTTTTCTGGTGGAGATCACG<br/> AGCGTTGCAAATCCACATCTCGCTCCTATCAGAACCTCCAAGTGTGTTGACGAGTATATCGGCACCTTTGCTCGGTCCCTCCACGGCAGAAAGTTT<br/> TGGCTCATGGAAATGACACTCTTCTGTCACTTGTCAAATACGAGTTTCTCATAGAAACCGCTCGAGCCAGCATTTCATTACACAGAACATTTG<br/> GCTACCTCACTTTTGGCGAGAGCATCAGAGGTTACTGAGTTGCAATTTGTGTTGACTGGAGCTAAGGCTAAACGAACAAAGTTCCAAACATTCA<br/> CCACATCTTCGTTGGTATTGCTAGCAAAGAGCAAAGGGTCTACTTTACTCGATGAAGACACGGCCGAGGAACCAGCAAAGTTCAATTTGGATTCA<br/> AGACCTTCTTCTCGAACGTCCACAGTACGATGCTCTCGAAGACATAAAAGAACCCGTTTCTAAAAAGACCAAATTTGAAGATGAGGACCAGAA<br/> AAACGAAGTTCCGCTCTTGCTATAGCACGTACCAAGACCAAATTCCTTTGGAGCTTTCAGCCTTGGAATCCCAACGATCAACCCGCATTGAAC<br/> GACTTGGACAACCTTCAGCTTTTGTCTCCGTTTGATGGTGCTTCGCCAATCTTCGCCAGCTAGCAATTCGCTTGTCGAAGAAGAGCTCATGGCAA<br/> TTGTGAGCAGAGTCATATATCAACCATCGAAATCTGTCAACTGGGCCATTTTGGGAAGGGCGTTATGGGAGAGATCACTATTGGAAACAAGCAA<br/> GGCTCGGACCGTGGAAGAGGAATATTACAGATGACATCGTTAGTTGAAGAAATCGGTCTCAAGATTAAAACAGGCTTTTGCCCTCAGGAAATG<br/> GAAGCGAACAACCTCTTCCCCAGCTGCTTCTCGGCTCCGTTTCATCCACCAACTTCCGTTGATGCCACAGTGGACCATGGACGTTAAGTTGGCAG<br/> AAAAGTACATGTCTTTGGGAGTGTTGAAGTCTGCGTTGGAAATCTACGAAAGACTTCATTTGGAATGCGAAGTGGCACTTTGTCTGCTGCGGT<br/> TGACAACGAAACTGAGGCGGAAAACGTCTCTTACGTCTGTTAGAACAGCACCCCAACGATGCCAGAGCCACATCAATTCTCGGTGATATTCCG<br/> CCAGGACCCCTCAGCTCTGGGAACGAGCCTGGGAAATTGGAAGGTACTCAAAAGCAAAGAACTCGTTATCGAGGTATTACTATAACCCCTCCAGC<br/> AAATTCTGGACTTTCCAAAGACTTGGAAGCAGCACTTTTACATATGAGTGATTGTTTGAGGGGCCGACCCACTTAATTTTGAAAATTGGTTCTTTT<br/> ACGGCTGTTGTGGACTCGAAACTGCAAACTACGAATTAGCATCGGAGGCATTTACTCGTTGTGTTTCGTTAGATGACTCGAATTCGCATGCTTGG<br/> TCCAACCTGGCTACGGCGCTTCTAAGATTAGACAAGACCAGACCAGCATTCAATGCTTTGAAAAAGGCAATGGTGAGTTCAAAAGAAGGTAAG<br/> CGGTCTTGAGAAATTCATGAAAACCTTTGTCATTGTTGCCATGAACTCAATGAATGGTCTGATGTCTTACAAGCGACCAGAGAATTGATAGACAT<br/> GAAAGAAGGTGGAGAGTCAAGTATCGATATTCCTGTCAATTGAAAAGTTGGTGGAATTTCTCGTGGCCACAGATTATCCTAAGGAGGGGAGAGAG<br/> ATTGACTCATTATCAGAACTCGTGTATTGATTTGGTGTGCAATATGCTTCCTAATGTAATTACCAACTCTGGTAGATGTTGGAGAATTGTTGCTCGA<br/> GTTTCATATCTGGAGAAAGAAGCCATGGGAGGCATTGGAATGCTACGAGAAAGCTTATCGAGCGGTATCCCAAAAGCATGATTTGAGCACCAACG<br/> AAACCATTTGGAATGAAGCTGTAGAGGCTTGTGAAGACTTGGTCGCAGCATATGAGTCTCTTGAGAGGCTTCCAGGCAAACATGGAGCCGACG<br/> ATTTAGTGTGCAAGGACTGGAAATACAAAAGCAAAACGACAATCAGATCGTTAATGTGCAAGGGAAAGCTGATGTGGGAAGATAGTCAAGGCT<br/> GGGATCGCTTAATGGCGCTCAAAGAAAACCTTATGA</p> |
| D_105169 | <p>ATGTCGTACGATAATAATCACAACCTATTATGACCCGAATCAGCCGATGGGTAATGATGGTTATTATCAACAACAACCTTATGATGATATGAACCAA<br/> CAACCACATCAGGATTACTATGACCCCAACATGCAATATCAACAACAGCCTTATGACATGGACGGGTACCAAGATCCCAACTATCAGGGTCAAC<br/> AGATTCCTCAACAAGGATATAACGCTGATCCTGAAGCGTTTCTGATTTACGTTACGGGGGTCAAACCTCAGGTACTCCTGGTTACGACCAATAC</p>                                                                                                                                                                                                                                                                                                                                                                                                                                                                                                                                                                                                                                                                                                                                                                                                                                                                                                                                                                                                                                                                                                                                                                                                                                                                                                                                                                                                                                                                                                                                                                                                                                                                                                                                                                                                                                                                                                                                                                                                                                                                                                                                                                                                                                                                                                                                                                                                                                                                                                                                                                                                                                                                                                                                                            |

GGTACTCAGTTTACCCCTTCTCAGATGAGTTATGGTGGTCCCAGATCGTCTGGTGCTTCTACACCCATCTACGGTGGAGCAGGTGGAAACTACGA  
TCCAACCCAATTTCAAATTCCTCCAGCATGCCTTACCTGCTTGGTCTGCCGATGCGCAAGCACCAGTTAAAGTAGAGCATATTGAGGATATTT  
TCATCGATTTGGCCAACAAGTTTGGTTTCCAAAGAGATTTCGATGAGAAATATGTTGACTACTTTATGACATTATTAGACTCTAGATCCTCGCGTA  
TGTCTCCCGCCCAAGCCTTATTGAGTTTACACGCGGATTACATTGGAGGTGAAAACGCCAACTACAAAAAGTGGTATTTTGCTTCGCAACAGGA  
TTTGGATGAATCAATTGGTTTGGCCAACATGAAAATGGGAAAGGTTGGTAAGAAAGCTAGAAAGGCATCCAAGAAGTCCAAGAAGGCAAGAA  
AGGCAGTCGAGGAACATGGCCAGGACATCGACGCTTTGGCTAATGAATTAGAAGGCGACTACTCTTTGGAAGCCGCAGAAATTAGATGGAAAG  
CCAAGATGAACTCTTGTCTCCTGAAGAGAGAATTAGAGACATTGCTTTGTATTTGTTGTTGTGGGGTGAAGCCAATCAAGTTAGATTTACTCCT  
GAAGCCATTTGTTACATCTACAAAACGGCTTTCGATTACTTGGTGTCTCCTCAATGTCAACAAAGACAAGAGCCTGTTCCAGAAGGTGATTACTT  
GAATCGTGTTCATCACACCTTTGTACCGATTCTTTAGATCTCAAGTCTACGAAATCTACGAGGGCCGCTTGGTCAAGCGTGAAAAGGATCACAATA  
AGGTGATTGGTTACGATGATGTTAACCAGTTGTTCTGGTACCCAGAAGGTATTTCAAGAATTATCTTTGAAGATGGTACTAGATTGATTGACGTCC  
CACCTGAAGAGCGTTACTTGAGATTTGGTGAGGTCGAATGGCACAATGTCTTCTTCAAGACTTACAAGGAAATTAGAATTGGTTGCATCTTATC  
ACCAACTTCAACAGAATCTGGATTATCCACGGTACCGTCTACTGGATGTATACTGCTTACAACCTCCCAACGTTGTACACTCTCCATTATGTTCAA  
ACTATTAACAATCAGCCTCTTGCTTCATCAAGATGGGCTGCCGCTGCTATTGGCGGTGTTTTGGCTGCCTTCATTCAAATTGCTGCAACGGTGTG  
TGAGTGGATGTTTCGTTCTAGAGAGTGGGCTGGTGCTCAACATTTGACACGTCGTTTGATGTTTCTCATTATAATTTTCGTGGTTAACTTGGCCCC  
AGTTGTTTTTACCTTTTACTACGCTGGCTTGGCTGCAAAGTCAAAGCAGCGCTAGTGGTTTTGATTGTTGGGTTCTTCATTGGTATTGCTACGA  
TCGTATTCTTTGCCGTTATGCCTTTGGGTGGTTTGTTCACAAGTTATATGAACAGAAGATCAAGAAGATATTTGGCTTCTCAAACCTTTACTGCCA  
ACTTCAACAAGTTGACTGGCTTAGACATGTGGCTCTCGTATTTATTGTGGGTTCTTGTGTTCTTTGCCAAGTACATCGAATCTTATTTCTTCATGG  
CTTTGTCTTTGAGAGATCCCATTAGAACCTTGTCTACCACTAACATGAGATGTATCGGTGAAGTCTGGTTCGGCGACAAATTGTGTAAACACCAA  
GCTAAGGTGCTCTTGGGTTTGATGTACCTTGTGGACTTGTTATTGTTCTTTTTGGATACCTACATGTGGTACATTATCTGTAACTGTGTGTTTTCCA  
TTGGTCGTTTCTTACTTGGGTATTTCTATCTTAACACCTTGGAGAAACATTTTACAAGACTTCCAAAGAGAATCTACTCTAAGATTTTGGCTA  
CCACTGAGATGGAGATTAAGTACAAACCAAAGTTTTGATCTCTCAAATCTGGAATGCTATTGTGATTTCATGTACAGAGAACATTTGTTGGCT  
ATTGATCACGTTCAAAGTTGTTGTACCACCAAGTTCCATCTGAAATTGAGGGTAAGAGAACTTTGAGAGCTCCAACCTTTCTCGTTTTCTCAGG  
ATGACAATAACTTCGAGACGGAGTTCTTCCCAAGAACTCTGAAGCTGAGAGACGTATCTCTTTCTTTGCTCAGTCCTTGGCTACACCAATCTT  
GGAACCATTGCCAGTTGACAACATGCCTACCTTTACTGTGTTTACTCCTCACTACTCTGAAAGAATTTTATTGTCTTTAAGAGAAATTATTAGAGA  
GGATGACCAATTCTCCCGTGTTACCTTGTTAGAATATTTGAAACAATTGCACCCAGTTGAATGGGACTGTTTTGTCAAGGACACCAAAATTTGG  
CGGAAGAACTGCTGCTTTTGAAGGTGAAGGTGTCGACAAAGAGTCTGAAGATGGCCTCAAATCTAAGATTGATGATTTGCCATTCTACTGTAT  
TGGTTTCAAGTCTGCTGCTCCTGAGTATACATTGAGAACCCGTATTTGGGCTTCTTGGAGATCCCAAACCTTGTACCGTACCGTTTCCGGTTTTCAT  
GAACTATGCCAGAGCCATCAAATTGTTGTACCGTGTTGAGAACCCAGAATTGGTTCAATATTTTCGGTGGAGACCCAGAGGGCCTTGAACCTCGCA  
TTGGAGAGAATGGCAAGAAGAAAATTCAAGTTTGTGTTTCAATGCAAAGATTGGCCAAGTTTGAAGACTGGGAGATGGAGAATGCTGAATTT  
TTGTTACGTGCTTACCCTGACTTGCAAATCGCTTACTTAGACGAAGAGCCTGCCTTATCCGAAGAGGAAGATCCAAGAATCTATTCCGCTTTGAT  
TGATGGTCACTGTGAAATTTTGGAGAATGGTAGACGTCGTCCTAAGTTTAGAGTGCAATTGTCTGGTAACCCAATTTTGGGTGATGGTAAGTCTG  
ATAACCAAAATCATGCTTTGATTTTCCACCGTGGTGAGTACATTCAATTGATTGATGCCAATCAAGACAACCTACTTGGAAGAATGTTGAAGATC  
AGATCTGTGTTGGCCGAATTCGAAGAATTGAACGTTGAACAAGTTAACCCATATGCTCCTAAGTGAAGACTGATGTCAAGACTGGAAACAATG  
CCCCGTGTGCTATTTTGGGTGCTCGTGAATACATTTTCTCAGAGAACTCTGGTGTTTTTGGGTGATGTCGCTGCTGGTAAGGAACAACTTTCCGGT  
ACCTTTTTCGCAAGAACTTTGGCACAGATTGGTGGTAAATTGCATTATGGACATCCTGATTTCTTGAATGCCACTTATATGTTTACCAGAGGAGG  
TGTTTTCTAAGGGACAAAAAGGATTGCATTTGAACGAAGATATTTATGCTGGTATGACTGCTATGTTAAGAGGTGGTAGAATCAAGCACTGTGAAT  
ACTACCAGTGTGGTAAGGGTAGAGATATGGGTTTCGGATCCATTTTGAATTTACAACCAAGATTGGTGCTGGTATGGGAGAACAGATGTTGTCT  
CGTGAATATTACTACTTGTGCGACTCAGCTTCTTTGGACAGATTTTGTCTTCTACTACGGTCATCCAGGTTTCCATATTAACAACCTGTTTCATTC

AATTATCTTTGCAAGTTTTTCATGTTGGTGTGGCTAACTTGAACCTATTGGCTCACGAATCCATTTTGTGCTCCTACAACAGAAACACTCCTATCA  
 CCGATGTGTTATATCCTTACGGTTGTTACAACCTTCGCTCCCGCAGTTGACTGGATTAGACGTTACACATTGTCTATTTTCATTGTGTTCTTCATTGC  
 GTTTATTCCATTGGTGGTTCAAGAATTGATTGAAAGAGGGTGTCTTGAAGGCAGCCCAAAGATTCTGTGCGCATCTTATCTCGTTGTCGCCAATGT  
 TCGAAGTGTTTCGTTGCTCAAATCTACTCGACTTCATTGATTACTGATTGACTGTTGGTGGTGCCAGATATATCTCCACTGGTAGAGGTTTTCGCCA  
 CTTCTCGTATTCCATTCTCCATTTTGTACTCCCGTTTTGCTGATTTCATCGATTACATGGGTTCAAGATCTATGTTGATTTTGTGTTGCGGAACAGTT  
 TCTCACTGGCAAGCTCCATTGTTGTGGTTCTGGGCATCGTTGTCATCATTGATGTTCTCACCATTATTTTCAATCCTCATCAATTCTCTGGGAAG  
 ATTTCTTCATCGATTACCGTGACTTTATCAGATGGTTATCCCGTGGTAACTCCAAGTGGCATAGAACTCTTGGATTGGTTACGCTCGTCTTTTCGA  
 GATCTCGTGTCACTGGTTTCAAGAGAAAGTTGACTGGCGATGTATCGGAGAAGGGTGCTGGTGACGCTTCCAGAGCACACAGATCCAACATTT  
 TCTTTGCTGACTTTTTGCCTACTTTGATCTACACTGCTGGTCTTTTTGTTGCCTACACTTTTATCAACGCCCAGACTGGTGTAAGAAGGGGACCA  
 AATGGTGAGGGAAACCCTACTGAGGTCAACTCTGTGTTGAGAGTTGTGATTTGTTCTTTGGCTCCTGTAGTTATTGATCTCGGTGTTTTGGCAGG  
 ATGTCTTGGTCTCGCTTGTGCGCAGGTCCATTATTGGGATTGTGCTGCAAGAAGACTGGTCTGTGATTGCCGGTGTTGCTCATGGTATTGCCG  
 TTGTTGTGCACTTGGTCTTTTTTCATTGTCATGTGGGTCTTGGAAGGCTTCAACTTTGCTAGAATGTTATTGGGTCTTTGTACCATGGTTTACATCC  
 AAAGATTGTTGTTCAAGTTTTTGACGATTTGCTTCTTGACCAGAGAGTTCAAGAACGATAAATCTAACCAAGCTTTCTGGACCGGTAAATGGTA  
 CGGATCTGGTTTGGGATGGATGGCGTTACCCAACCAGCTCGTGAATTCTGTGCCAAGGTTATTGAAATGTCGGAGTTTGCCGGAGACTTTATTT  
 TGGCACACATCATCTTGTGTTGTGCAATTGCCTATCATCTGTATTCCATTGATTGACAGATGGCATTGACCATGTTGTTCTGGTTGAAACCTTCCA  
 GGTTGATCAGACCTCCAATCTACTCATTGAAGCAGGCCAAGTTGAGAAAGAGAATGGTGAGAAGATACTCTACTCTTTACTTTTTGATTTTGGTT  
 ATCTTTGTTGCACTTATTGCTGCACCTGCTGCTATTGGTAACACCCTCTTGTACCAGAAGACTTGGGTAAATCGTTGAAGGGTACTTTTGCTGG  
 ATTGTTCCAACCCAGACACGTTGAAAACAATGACACTGGTACTTCGGTGGGCAAGGCTTACATGAGTCTGCACACATTCTTGACCAAAATGTTT  
 AGTGGGACGACGACCAAAATATTCCACCAAGCCATAA  
 ATGTCCCAACTAACTCTCGCGTAGCAGGTCTTCTTTTTACGTTGCTTTGACTACAATACATCGAGACTACGTTGGAACCTCTTCAAACCTACAG  
 GAAATGGCTCAAGGCAGCTTGCAAACAAGATGGGAGTGATGGGCCCCGAAAGGATAATTAACGAAAACATTAATACAGCTTGCAAGATGTA  
 CGTAACCTGAAGTTGCCTTGACCTCTTAATATGGGGAGAAGCCAGCAATATCAGATTCATGCCAGAATGCATTTGCTTCATTTACAAGTGCTGTCT  
 CGACTACTATATGGCAGAGGACAGGATCACGATTGCAAAACCATTTCTTGACCACACGATTGTACCTTTGTTTGAATTCTTGAGGGGAACAACAAT  
 ACAAACCTAAAAGACGGAACTGGATTTCGGAGAAGGCGGGACCATGCTCGTATCATAGGATACGACGATATGAATCTGTTTTCTGGTATAATGA  
 AAACCTCCAGAAATTAGTGGTCGATTTCGGGCAGGCTCTATGATATGGCTGCACTGGACCGATACCCAAGCTTTGACAAAATTGATTGGAACAAA  
 GCTTTCTTCAAATCCTACAGGGAAGTACGCACCTGGTCTCACCTTTTGACCAACTTCAGTAGGGTATGGATTACACACTTGACAATGTTCTGGTA  
 CTTTACCAGTTGCAATTCATCTCATTGTACACAAAAGAATACAGCCCAGAGTACGACAACACGCCTCCACCTCATGTTATTTGGTCAGTGGTTT  
 CATTAGGTGGAGTATTAGCATCGACAATTGCCCTTGTGAGTTGCTTGATGGAACCTTAGATTTCGTACCAAGAAAGTTTCCAGGAGCGCCATCTGTA  
 TTGGGAAGAAGTTTACTTCTCATGGCTCTTCTGGCCTTGAATCTTGGACCGTCTTTTATCTTTTGTGGATATTGCCTGCTGATGTCTATTCAAGGT  
 CGGGTCACTAATAGGGATCATTAGTTTGGGATTTCTGCTGCCACTTTCTTATACCTAGTGCTTGTTCCTCCCGCACAATACTTCTCTTGCACT  
 TCCATCCCAGCCCAATTACATCATGCTTTTACTTCAGACTTCCAAAACTCCCCACGAGAACCAAGGCAGTTTCTGCTTCACTATGGGTTCTGG  
 TATTCACCTTGAAATCTTGGAGTCGATTTTTTCTTGACATTATCTGTCAAGGATCCAGTCAAGGTTCTATCCCATTTGAGAATGACTAGGTGTCA  
 TGGTGATTCCATATTGGGTACACTTTCGTGCCGTTATCAGCCCACAATAACGCTTGCGTTTATATTCGTCATGATTGTTGTTCTTCTTCTGAT  
 ACGTACTTGTGGTTCGTTCTCTGCACTTGCATGCTTTCCATAGTAATTGCCATAAAGAATGGCAATTCTATATTTACGCTGTGGAAGTCGGTGT  
 TCCCAGCTACCGGAAAGGTTGATATCCAAAACAGTCAACGTTGACAGCGTGGGAGACGCAATAGTGGCAGCCAGCCACATGTGGAATGCTATT  
 GTGTACTCCATGTATCGAGACCACTTGATATCAGTTGACCAAGCCTCAGCATTAATGTATCAACTCCCCGATACGGACTTTGTTCAAAGTTCAGCT  
 GATGTTAAGGCACCTATTAACCTTCTCAGTCACAATCATGCTATCCACTCGGATGAATACTTTCCTCAATTAGGTGAAGCAAAGAGACGAATCTC  
 ATATTTTGACAATCGTTAAGTTCGCCTCTCTGTAACGCAGATTTACCACAGACGCTTGTCCAGCATTCACCGTATTGATCCCACACTATTGAGA

D\_105067

AAGTATACTTCTTAGCATCGAAGAGGTGATCAGAAGATCTAAGCAAACCCAGATCACCTTGCTTGACTACCTCAAGAGTTTACTGAGCTCGGAC  
TGGACGAATTCGTTTCGAGACACTAGAGTCGCTGACGATGAAAAGTTCGGTTGTAGGTTTCCAATTCCTCTAACTTCGGAAGGTACAACAGACT  
ATGATAATTTGCCTTATGAGTATTACGGTTTCAAATTCGCAGACCCGGAAAGTACTTTAAGAACAAGGATATGGGCATCCTTACGCTCTCAAACCT  
TATACCGAACAGTTTCCGGCTTCATGAATTATAGACATGCGCTTGCCGAATTATACAAAGCGGAGCACGAAGATTGCATCAACCACATTTCATCATT  
TGACTTTTGAAGACGAATTGAAAGCACTCATAGAATCTAAATTTACATTGCTAGTGTCGATACAACGACACAGCAAATTTCTCAGAGTCAGAAAT  
GCAATCGTTTCGAAATCATGGCTCAAATTTCCCCACAATGAAAATATCAGTTCTCGAGGAGATCAAAGAGGGGCGACAAACTGGTTCATTATTGC  
TCACTATTGGACTTGGCCAAAAAAGACGAAAGTAGCCAATATGGCAGAAAATTAATAATCAGGCTTCCTGGGTATCCTATTTTGGGAGACGGCA  
AGTCTGACAATCAGAACACAAGTGCAGTGTTCTATCGAGGAGAGTACATTCAAGTCGTAGATTCCAACCAAGACAACACTACTTGGAAGAATGTTT  
GAAAATCAAGTCAATGTTGTCTGAGTTTGAGGAGCTAAATTTGGCACCAGTAAGAGGAACATCCATGACCAGACCTCCAGTTGCAATTGTTGGC  
GCTCGAGAGTATATCTTTTCGGAGCAAGTTGGCGCCCTTGAGACATCGCAGCAGGTAAAGAACAACACTTTTCGGAACATGTTTGGTCGAGCAC  
TAGCTTTCATGGAAGGCAAGTTACATTATGGCCATCCCGATTTTCGTAAACGGGATCTTCATGTGCACTAGAGGCGGACTTTCCAAGGCGCAACGT  
TCACTTCATTTGAATGAGGACATTTATGCTGGCATGAATGCAATTGCTCGTGAGGAAGAATAAAGCATGCCGACTATTTTCAGTGTGGAAGAG  
GCCGTGATTTGGGGTTCAATACAATCTTGAACCTTACTAGCAAAATCGGGGCAGGCATGGCTGAACAAACGCTATCTCGTGAGCAGTTTTATTTT  
GGAACCTCGGTTACCTACCGATCGCTTGTTTTCTTCTTTTATGCACATGTTGGGTTTCACATTAACAATGTGCTCATAATACTCTCGATTTCATTTATT  
CCTGATATTCCTCTTTAACATAGGAAGTCTTCGAAATGAGAGCATTGTCTGTGATACCACAAGTGGACTCACTGAGCCTACTCCCATAGGCTGTT  
ACAATATCAAGCCAGCAATTGATTGGATCAGTCGCTACGTTCTTTCAGTCATAATATGTTTCTTCTCTCGTTTCACGCCATTGGTGATGCAAGAGT  
TTATTGAACGAGGAGTGTTGAAAACCGCTAAAAGAATCTTTTTCCACTTAATTTCACTTTTCGCCGTTATTCGAAGTATTTGTTTGTCAAGTATACG  
CAAGTGCATTCGTGGATAATCGGTCGTATGGTGGTGCCAGATACATTAGCACTGGCAGAGGATATGCCATATCTCGAATTTCTTTCGCCACGCTTT  
ATTCGAGGTACGCATCGTTATCAATTTATTGGGGCTCACGCTTAAGTTTGATAATCATCTTTGCGTGACGACAGTATGGCAGATATCCTTGTTGT  
GGTTTTGGATCACTTGCTTATCCTTGTCCTTTACCGTTTCATTTTAAATCCACATCAATTTGACCGAACGGAGTTCTTCCTTGATTATAGAGAGTA  
CCTTAGATGGCTTGGGAGAGGGAACCTTTTCTCGATGCCGTAACCTTTGGGTCCGCCACGTTTCGGTTTCAAATAATAAAGCTGACTGGGCTCAAA  
GGACCTGGAAGTAACGAGCTGGAAGACTTAGTTACCCCAATCTCCAAGTTTCAGGTTTCGCTATATGGAATTTGGCCAAGGCTATTCTCAACGTTT  
TGAGCTTCTTGGCTCCGTACATGTTCTTGAACCTCACAAAATGGAGTAGCTGAGCCATCAAAAGTCAATCCTTTGATGCGGGTAGCTGTGATCGTT  
GCAATCCCACTAATCAGCAACATCATAATATTAGTTGTGCTCTTTGGTATCTCCATACTTCTAGGATCTATGATAAGAAACAAGCGTTTCGCGGATA  
CTATTGCAGCAGTTGCTCATATCTGGTCAATCTTGGCACATGTAATTGTCATCGAAATAACCTGGTACATCCATTTCATGGAATCTTCCACGCAGTT  
TGGCGTGTATCTGTCTTGATCACCATTACGCGGTACTTGATGAAGCTTGCTAAGTATGTGTATTTCCAAGAGTCAGACAGGTTGGAAGCC  
AATTCTGCTTGGTGGTCAGGGCGATGGATTCAACACCATCTAGGATGGCACATCTTATCGCAGCCATTCCGAGAATTAGGATTGAAGTTAGTCGA  
GCTAAACTTCTTTCGATTTGACTTTCTTCTAGGGCATGTCTTGTTTTGCTGCTTGAACCATGCTCTTTATCCCGTATATTGGTCAATTACACTCG  
TTGATGATGTTTTGTTTTGTTTCGTCACAACTCATTGAATGTGAGTGGAACACAGCACTTGCATAGTCGACAAAGGAAGCGCCAACGAAAACAG  
GCGTGAGATATTTTTTCGTATTCATTGGAATCCTAGTGGGCATATCAGCATTACTTGTGCTCCGTATCTTTTGAGAAAATACTGGGAATTCTTGG  
ATAAGTCGATTCTACCTTTGCGCAGCCATTGTTCCAGCCTAGCAACCAGGATCAAAATGATACAGGACCCAGAGCACCTTCGAGCTTCTGGAG  
CAAAAAACCACCTCCAGCAACATGGTCTACCATATGGTGA  
ATGAAATCTGGTTTATTTGGATTAAAGTTTGATTGCCGCAACATTTGCGAGAAATATTGTGTATCCAGAATGTTTTGAGGAACAAGTCAAGTTGGC  
ATTGAATGTTGATAAATTGGAACCAAGCGTGTCTCCTTCGGGGATCAAGTTGGTGTGTTGTTTATAAGGCTCGTGACACCAGCGAAGAGAATTTG  
GATGGAGAAATCACCAAGGTGGTGGATGCTGAAACGCGGACCGCTGAGTCAACCGCTGGGTTGGCTACGTCGACTGCTGGGTTGACCGCTGCT  
CCAACCTCCCGCCACTATTGTGACAAATTTCCAATACGGTACTACCACCTCCACCATCTATACCGCATCATCGACTCCAGCCTCCACCACATTTACG  
TCTGTGCAAAAATTGGAACTACTCGAAGAAACCTCTTGCAACGGGTGGAATCAAAATCTTTAAACCTCTTGCAAGAGTCTATCGAGATTGCCA  
GCATAACCGATGGTGTGGTCTTTACAAACACCCTGTTTCCAACAAATGGACCAAAAATGCGGTATACACAGCCATCATTAACCACGAAATTTACC

D\_104046

GTTGCATCTGCTGTTCAAGCTGGCTGACAGTTTGGCCAACAAAGCGTTGACAGAAGTTGCCAACACTGCCTTAGAGACCAACGATACTTTACTGT  
CAAGGTCACCTGAACTCTCACTGGTTGAGAAGCATGTTATAGTGGTAGAGTCATCGTGTGAACTGTCCAGTTCTCTCGAGCCATCCTCGTTCAG  
TTCCGAGCCATCGAGTATCCCGTTCAGGTCCAAGCCATCGAGTATTCCGTTGAGTTCGGGCAGGTACTTGAATCTGACCTCTGCACTGGCCACTT  
CCGCTCCTTCATCTGTCTTGGTTGCACCCCACTATTCTGCCTCTTCAATTGCAAGCTCGCTGTCTTGCTACTCAAGCTCTGCATCGACTGGCTCGC  
TGTCTGGCTACTCAAGTTCTGCAACATCAGCTGGCTCGCTGTCTGGATATTCGAGTTCTGCATCATCAATTGCAAGCTCGCTGTCTGGATACTCA  
AGCTCAGCTCCTTCCTCATCGCCAGAAAGTGAGAGCTCAACCTCCGAGTCTTCCGTTGCTCTGTGCGCAAGTGTGACGGAATCCTCTAGCGAGT  
CAACAATTGCAACCTCGACCCAAACTTCGTGCGCTGCTTCGCCTCGATTATTTAGGGTCTTCTCTTCAACTTCGACTGCAAATGGTTTCACAGGC  
GATTTGTTTAAGGCAATTTCCACCAACGCCGTCTCAGGTAAATTTCTAAACAAAGCTTACCATTGGCAATTCCATCTGGTGTGACAAACTCGGA  
TAAATACCAAAACCAACAAGTTTTATGTCAATCTCTTTCTTGGTGATCAAACCGATATGATCTGGTCTTATCCCTATGGAATGCAGTACCTGAAGTC  
AACCTACTACGGATGGGCAGTACAACATACGATCCCCAGCGCTCGAGTATTTGGTAATGTCAATTCCAACAACAACAATCCCTCATACTTTTTCA  
ATCCAATCAACATCAAGGAATTGATTCTTTACGCAACGTCTTTCACATCAAATCTCAAGATGTCAGTCTCCAACATGAAGGTAATGTCGGCTTTG  
GTCAAATTAGGACTGGCAACTAACTATATCGAGGTCCCTGTGGTGCAAGGTATGGGATTCGTTACTTCCATATACCATGGAATCTCATACTCAA  
ATAAATCAGGAGTTGGAGTCAAACTCTCGTGAAGGAACTTCCTCCAACTTGTTGTCCAACATATTGAAATTTAGAGCAACTCTTTTCAGCG  
GCACTGAATATTTGATATATGTGACGTTTCCCAGTGGTACGTCCACCAGCGGATTCACATTTTCAGTTTCAAATTCGAATACAATCAAAGCATCTA  
AGAATATCAATGGTTTGATGATTCAAATTGCCGTGGCCCCATCATCGTCACAGGACAAATACTACGACCAGACGGCAGGAACGTATGTTACTGAA  
TCCAAAATCAAGGCGCATGGTTATGGTGGAACGACCGCTGAATATCGATTCTCATACTAAAGCAGGTTTCATCAAAATCCAACTTACCTATTGT  
GTTTTTATTGCCTCACCATGTTGACCTGATTGATGCAACCACCAAAAACGCTGCCACTGGTATCACCTTGTCATCCACAATAAGGAACAATGT  
CTGCTTATTTGGCTAGCGAAATCATCATGAATGAATCGCTAAACTACAACATTCAGTTTTTGCCTTGGGTTCAACAAATGGGTACAACCTGCACCA  
TTTTACACGACGAATCAACTCAAGCTTCTTGCACTGGCGGCCAATACTGAGTTATCGGTAGATATAAAGACGATGGTCTTATCCATGAACCTAAA  
CTACTATTCAGGAAAGGTTCTTGATAAATATGCTTACATTCTCTTGGTTGTGAGTGATATCATTGGTGACGAAACATTAGCAAAGTCAACCTTGAA  
AATACTCAAGGACACTTTTGCAGTGTTACCAACAATCAGCAATATTATCCCTTGATGTACGATACGAAGTTTGGAGGAATTACTTCGACTGCAT  
CACAAGGAGGTGATACTGGCGCTGAATTTGGAAGCGCATATTACAACGATCATCACTTCCATTATGGATACTTTGTACATGCTGCAGCCATCATTG  
GTTATGTCGACAAGAAATACGGAGGAACTTGGTATAAAGATCAACAGTTTTGGGTGAATGCGCTCATCAGAGATGTAGCGAATCCATCGCCAGA  
TGACAAGCAATTTCCCGTATTTAGAATGTTGATTGGTTTGGTTCATTATGGGCATCGGGGCTTTTCGAGCCGGTGATGGTCTGTAATGAGG  
AATCGAGTTCTGAAGATTACAACCTTTCGCTACGGAATGAAGCTTTGGGGTAAAGTATCAGGCAATCAAAGAATGGAATCAACAGGAGATCTTAT  
GCTCGCGGTGATGAAGAGAAGTATGAACATGTACATGTACTATACTTCATCAAACTCGGTTGAACCATCACAGATACTTCCAAATAAAGTATCTG  
GTATCTTGTTTCGATAACAAGATTGATTACACAACCTTATTTTGGAGCACCAACGCACATCCCGAGTATGTCCATGGTATTCATATGCTTCCAATTAC  
ACCAGCATCTTCACTCATTTCGAGGCAGTGCATACGTAAAGGAAGAATGGCAAGATCAAATCTCCACATTTATCTCCAACGTCAAAGACGGATGG  
GCAGGAATTTTGCATTGAACCAAGCGCTCTTCGACGCATCTTCTTCGTACGCATTCTTCTCCTCGAGCTCATGGTCTTCTGCCTACCTTGACAA  
CGGTCAAAGTCGGACTTGGAGTTTAGCGTTTTTCGGCCGGTGTGAGCAACGCATTGAGTTAA  
ATGAAGTGGGCCATTGGCGCTGCTGCCATTGCGGGTGTAGCTTTGGCTGATTTCATCAATAATTCAACCTTGACCACTGCCACTCCATCCGTTGG  
CAAGTCTTGTTCTTCAAGGACTTTACTGCTACCAAGTCTGCCGACGTGCAGTCTGTCGCTGCATGTGCCACTGCCGTTGGTGACATCACCATC  
GAAGGTGACTCTTTTCGGCACCATCGAATTGACCGGTCTCGAACAACCTTTACGGTTCTCTTCAGGTGAACAATGCTACTCAAGCCACCAGCTTGA  
ACGCTCCTACCTTGCAATTGGTTTCTGGTCAATTGGCGTTGTCCGGTAACACCATCTTGTCTACCTTGAACCTTGGCTCAATTGACCACTGTGGGA  
ACCTTGCACTTCAACGCTTTGCCAGCTTTGGAACCAACCGGTTGTCTGCTGGTATCACTTCTGCTGACGAGGTGATTATTTCCGACACTGGTTT  
GACTTCATTGGACGGAATCAATGTGTTCAAGTTGCAAACCTTTGACGTTAACAACAACAAGGATATCGAGACCATTGACTCTGGTTTGAATCT  
GTCATGAACTCTTGTCATTGCTTACAACCTTGAAAAGGTGGACGTTGCTTTGGACGAATTGACTTCTGCCAACACCGTTTCGTTCCAGTCCA  
TCAACTCTTTGTCTGTTGCCAACTTGACCAAGATCGGCGACTCTTTGTCGTTGACTCCAACCTCGTTGGACAAGATTGAGTTCAAGCAATTGAG

D\_104112

---

CTCGATCGGCAAGTCTTTGACCATTCAAAAGAACGACAACCTTGGAGGAAATTGACTTCCCCAAGTTGAAGTCGATTGGTGGTGCTTTGGTGATC  
CAACTGAACGACGAATTGAAATCTTTTGATGGCTTGCCAAAGTTGGAACCATCGGCGGTTCGGTCAACCTCAAGGGTAAGTTTGACAATGGTA  
CTTTGAGTCTTTGCAAAGAGTTGCTGGTGGTTTCAACTTGGACTCCACTGGAGACTTGACTTGTCTGGAATTCAACAAGTTGAACAAGGACG  
GAGACATCAAGGGTGACAAGTTTGTGTGTAAGGCTGCTGACGAGTCGTCATCTTCTTCGTCTTCAAAGAAGGGCAACTCCAATGGTACTGCCA  
CCAGCGATGACTCTTCTTCTGAGACCAGCAGCTCCGGTGGTTCTGGTTCTTCTTCTTCGAGCTCCAAGAAGAGTGATGCCAACTCTGCTGGTCT  
TAACTTGGCTTCCATTCTTGCCGGCTTCGTTGCCCTTGGTGCCACCTTATTTTAA

D\_101126 ATGCTTTACACTTCGATTTTGGCAGCGTTGACCGCAGCCACCGCCGTTGGGGCCGCTAGTGACAAATGTTTCATTCTCTACCACCGTCAAGGCAG  
CCACTGCTATTTCTGACTTAAATTCTTGTGAAACCTTGGATGGTACTATCAAGATTACTGGTGACGATTTGGGTGATATCGACCTCAGTGGGGTCC  
AAGAAATCAAAGGAGATATCAACTTTTTCAACTCATCTTCTGTACCTCCATTAATCTCAATCAGTTGAAAAAAATCTCGGGTTCGTTGGCAGTT  
AATGCTTATACCCAATTGCACAGCATTGACTTCACCAGTTTGAGTGAAGTCGAGAAATTGTCTTTGATTTCATTGCCATCATTTGCCATTCTCAAC  
TTGAACACTGGTGTTTCGAAAGCAGGTTCCATCGAGATTTAGACACTGCTCTTTCGTCTTACAAGGTCTTACCAACTACGACACCGTCAAGA  
GCTTGAACGTAAACAACAAGAACATCACCTCCATCGACTTGGCATTGCAAACCTGTCGACGAGGACCTCACTTTGAGTTTCAACAGTGACG  
ACTGTGAGGTCAAATTGAACGAATTGATCTGGTCTTCCAATTGACCATCCAAGATGTCAGTGACTTTTCTGCCTCCAACCTGACCGCCGTCAAT  
GGTACTTTGAACATTGCTTACAACAAGTTTGACCAATTTGACCTCAAGGAATTGACCAATGTAGGCGGATCTGTTCTCGTTTTTCGCTAATGACGA  
GATGACTTCGTTGACTTGAGCTCCCTCAAAAACATTGGAGGAGAATTGAGAATCTTCAACAACACCGAGTTGGAAGACATGAACGATACTTTT  
AAGAAGTTGGCCAAGGTAAAGGTGCCGTCAACATTAACGGTGCTTTCCACAACCTTGACCATGCCTGGGTGAAGGAGGTGGATGGAGACTTT  
ACCGTTGTTTCCACTTCTGACGAGTTTCACTGCCAAGATTTCAACAAGTTGAAAAAGAATGGTGACATTGAGGGACACAACCTACAAGTGCTCT  
GCCCCCAAGAAGGAACAATCTTCCAAGTCCAACCTCTTCCAAGTCGAGCAGCGGATCTGGATCTTCTTCTCTGACAGCTCCGATTCCTCGTCCT  
CGTCGTCATCTGATTCTGGAAAGAAGAAGAGTGGATCCACCAAGACCATGGCTGGAATGACATTTGTGTTTGCCGTTGTGGGAGCAGTGATTGC  
CATGGCATAA

D\_102974 ATGAGTAAACAGGCCCGGAAATCGACCAAAGATTTAGCATGAGAAACGGTGTGAGTCTCGGATGTCAGCATGAGAGTAGGGAACGTTAGT  
GACATCGATGAGGAGTCTACGGGACCCATGGAGGTGCCAGAGCCCAAGAAAAACAAAAGTTTTTGGAGGTACACTTTTCCCGCTGCATTTTCA  
TCTCTCGGTGCCATTTATGGAGACCTTGGAAACATCTCCATTATATGTGCTAAACTCGGTCAAATACCCTCATAAAGAACCCACTGAACGAGATATC  
ATCTGTGCGGTTTCGGTGATCTTTTGGGTATTACGCTCATTGTTATCGTCAAATATGTGGCGATTGTGCTTTTCTTTGGTCCCAATAATGGTGAAG  
GTGGTCAGGTAGCCATCTACGCCAAAATCGCCCGACACCTTAAATCGGTCTTAAAGGTGTAACCATTCTGAGACACCGGAAAAAACCGATCT  
CGAGCTTCTTTCTCGACAAGAAACCGTGCTGAGCTTTGTTTCAAGTACCAATAAAGCGTGGAACAAAATCCGACAGTGGTGAAAGTGGTCTC  
GTTTGTGGTTCTAACAGCATGCTTTCTTGGGTGCTCGTTGATCATTTCCGATGGTCTTTTGGTACTCCCACAACCTCGGTGTTGAGCGCTATAGCTGG  
TATCCAAATTGCAAAGCCAGACTTTGACAATGTCTTGCAGTTTCTGAGGTGGTCTTTTGGTGCTTTTTTGTATCCAGCAGTTTGGATCCCACA  
AGATATCGTTCACTTTTGACCCATAATCACCTTTGGCTTTTTCGGCTTGATTATCTGTGGATTGTACAATATCATCAATATTATCCTGCCATCTTC  
AAGGCTATTTCTCCGCATTATGCCATTGAAATTTTAAAGGCGGGTGGAATCGACGCTTTTAGTGTTGCATGTTGGCTATAACTGGAACAGAAGC  
TATGTTTGCCGACGTGGGACATTTTGGTCGAGCACCGGTTTCACTCGCTTTGACTTGTTCGTGTATCCAGCATTGATGTTGTGCTATTTTGGACA  
GGCTGCGTACATCATTATCATCAAAAAGCACTTTCAAATCCATTTTCTACTCGATTCTTGGAGGCACCAATAGTGCGCCATACTGGATTATGTT  
CGTGTGGCTACACTCAGTACCATCATTGCCAGTCAGGCACCTCATCTTGGGAGTTTTTCAGTATTCTTTCGCAATTGATCAATTTGGACTGTTTCCC  
AACTTTACTATAATTCATGTGTCCAAATCGCATGCCGGTAAGGTGTATCTTCCAATGGTTAACTGGATGCTCATGGTGGGTGTGCTCTGTACCAC  
TGCTGGGTTCAAAAATAGTAACAATGTCACCGCTGCTTATGGATTGGGTATCACGCTCGATCTTTGTTTGACGACAATTTTGTGACTTTATGCTT  
CATTTTCGTATATCAAGTCAACATTTTGTGCTGGCTTTCTTCTTTTGGTGTTTCTTCCGTTGGAGATAGTTATGGTGATTCCAACCTGAAGAAA  
ATCGAACATGGAGCATGGTTCCCCATCATGATGGCTGGAATCTGTTTCTCTTTTCTTGGTGGGCAAGAGCCAGAAAAGTCGACC  
ACGAATTCAGTTCGAGGGCTCGTATAGATAATGTTTTTCCATCTTTGAGACGGACTGCTCAAACCGTCGATTTGGGCCGCGGAAGAAGCCCTAC

---



AAGAAAAGACGAAGACGAAAGCCGTGAAGAATCTGTGGCAGAATGGAACGAGAACTTGATTGTGAATTCAAAGTTTGGTGAATTGGCATTGA  
AGACATACGACGGAGTGGCTATAATCCATTGTGAATCATCGTACCAGAATCTCATGTCTCCAAATACCGTTCCTGAATTGTACCAAAGGGTGGTT  
TCGTCGTTTTGCTTCGTTGCCGAGAATTGTGATTTTTTGTCCAAAAGAGCGTTATCTGTTCCCTGTGGTTCCACAAGACGAACGAGTGCTTCTTGG  
ACCTACCAAAAATCCAGGGCCATTTTCGGTGTGTCTTGCGATATGGGTTCCACCGAAGAGATGGTTATCGATAAAGATTTGATGCAACATATTCTCA  
AGTCTGTGCCTGGATATGTTGAGTTGAACGATAGTCCTCATCGAGACCAGATTCCGGTTCAGTACTTCATGTTTTCGACAAGAGTGTTGTCAAG  
TCTCACACCTACTCGAGCAATCCCACTCGGAATATCCTTAGAAAAGCCGGAAGACGGGTGCGTATTTTTGCCATAGAGCATATCTTCAGTCCTAT  
CACTTCGATCTTCAACTTTCACGGGCAGTACTTGAAAATAGAGGATGAAGCCGAAGAAACACAGCGCAAGTTGTTTCGTTGGAGGAGTAGTTAG  
AATCTGA

D\_104268 ATGGAGCACTTTGATCCTCGTCGTGAGATAGACAAATACTCGCTTGATCTGTCTACTTTTGACCTTATAGATGTGGGAAAATTTACAAATTTGAAA  
TGCTCGACTGTGTTTGATTATATGTTACATGGCTGCTTCTAATCCTTGGTGTGGTACTTCTAGGCGTGGATATTTACACTTGTCTCAACATTCTTG  
TTTTTCACCGCTGGAGTTCCGACGACTATAAACCTATGCATACTCAATTGCCAAATGGATATTTACCGGGTGTATTATTTTCCAGTTTGTGCTTCT  
CTTGTAACCACTGGATATGGGCCATCCATACTTATAGGACCCGAAACATAGCATTGGCATACTGAACAATATTGCTCGTCACTTGTACACGATTAA  
ATCTTACGACTATCATTGTCTTTTCAACCTGGTGGAAACATGACAATTTCTTTGATTGGGCATGTTTTCTTGCATACTTCGAGATGGACTCAGCTTT  
GCAAATTTCTCGTCGCCGATACTCCTCGTCAAGTAATCAATATCTTGACCCTTCGTTACTACGCTACCAACGAAAATTCTTCAAATGATATCATTCA  
AAATATCAAGCAGATCGCTACATCTAACATTTCGGCTCTCGGTGATCTTGTGCTTTATGCTTCTTCCGTGGCCATTTGGTCCATTTTCTTCTTCGT  
TTCGTGTTTGGGATGCTCTGCTACATTCCATGTTTGATGAAAATTTCGAAAAAGGGCCACACTAGACTCAAAAAATACTGCTGTTCCGTTGTAA  
TCTGCACGTTTCGCCGTTTCGTCTACAAGCATCACAACCACGCAGCAAATTACTTGAAGAAGGTATTCTCGATTTAAAGGAAATCAATGAAAAT  
CCTCTTCTCAACTCAGCGTCCACCACTGCCACATTTGACTCGGCTTTCCAGTACAAACCCGAACCAGCCAAAACCTTTCCAGCCAATGGACCGTT  
CTTACGACACACTTCCACGCTACGGCTCAAGACAAAACACTTATGAATCGTTACCACTCCAGAACATGCCAAATATGCAACGCCGTAGACCACC  
ATATGATCCATTTGGCGACGAGAACAAGATTTTCGAGCAAAGCACATTTGATGCACCAGGATCCTTTTCGGCGATCCTAAACTTGAAGATAATGATA  
TGAGCGACACAGAAAACGTATACGAGCTCTATAGAGGTGTGGAAGTCGAGCCACCTATGCATAAACGGTATAATGGATTTGATCCACCACCCAG  
AACTGGTTTCAGCTTCTTCGCTCACATTTTCTACAACAGGACCTTTTGAGCCAGTATCACAACCCATACTGACCCGGTTGCACCGCCAGCTTCC  
ACTCCGTCTATTTCTGGGCCTATAACTCGAACGGGGACAGCACCATATCCACCAGAAGAAACAAGCTCTTTGTTGGGAGAGACATCGGAAAGT  
GACTTGCATTCTAGGGAACCTGGAACCAATGGAACCTGGAACCGGAATCGAAACCAAGGGAAGCCCCATACCCCATACGCGAGTCGTACGCTCTC  
CCAAGAACCTCTGACGAATACTACAACAGGTAG

D\_101005 ATGACAGAGAACCCGTTTCGATGTGGAACAGGTTCTAAAACCACCCCAACGTGTCAACTCGGCTGCAAACCGCTATTGCACCCAGTCGGTGGAG  
GACACGGTGCTGGAGTTCAAAACCGATCCTCACAAGGGGCTTTTCAGACAATCAGGATATTCTCAACCGTAGATCCATACACGGTGTCAACGAGT  
TTGCCGAAGATGAAGAGGAGAGTCTTGTGAAAAAATTCATCGCAAGCTTCTATTCTGACCCATTGATCTTACTTTTGATCGGGTCTGCTGTCATT  
TCATTTTGGATGGGAAACGTTCGACGACTCCATATCTATCACCTTGGAATCACTATCGTCGTGACTGTAGGTTTTGTCCAGGAGTACCGTTCGGA  
AAAATCGCTAGCTGCATTGAACAAATTGGTTCCAGCAGAAGCCAACCTTGACACGCAATGGTAACACCTCTCATGTTCTAGCATCGACCTTGGTT  
CCTGGAGACGTGGTCCACTTTTCCCAAGGTGACAGAATCCCCGCCGATATCAGAGTAACGGACGCAGTCCACCTCTCCATCGATGAGAGTAATC  
TCACCGGCGAGAACAGACCGGTAATAAAATCACCAGAAGCCATCAAATCAGAAGCAAACGGTCTTATTCCAATCACTAACCGTCCGTCTGTGGT  
CTACATGGGAACCTTGGTTCGCGATGGCCATGGTTCTGGAATTGTCTAGCAACCGGTTCCAAAACGGAATTCGGTGCCGTTTTTCGAAATGATGT  
CAGAAATAGAAAAACCAAGACTCCGTTACAACAAGCCATGGATAAGCTCGGAAAGGATCTTCCATCTTCAGCTTTTGTGTCAATTGGAATCAT  
CTGCTTAATTGGTATTACCCAGGGTCGCTCGTGGTTAGATATGTTCCAGATTTCCGTTTCTTTGGCCGTGGCAGCCATTCCCGAAGGTCTTCCCAT  
CATTGTACAGTCACTTTAGCCCTTGGTGTGCTTAGAATGGCTCGTCATAGAGCTATCGTCAAGAGATTACCCAGTGTGCAACATTAGGAAGTG  
TCAATGTAATTTGCTCTGACAAAACCTGGAACCTTTGACTGAGAACAGGATGACTGTGACGAAAATATGGTTCGACTGATTTTGAAGGTACGTTCAA  
TTCCCCATTCTTGGTGGTTGAAAGGCTCGATGATAATACTTTACACCACAAGCTCACCAGCAACATTTCGCAGAATATTAGAGGCTGGCAATATCT

GTAACAACGCCAGGTATTCATCTGAAAGCGAGAAGTTTGTGGAAACCCTTCCGATATTGCCTTTGTTGAATGCTTACCACACTTTGGTCTTGAC  
GATACTCGTGGTCAAAAAGTACGTACTTACGAATTGCCCTTTTCCTCAAGAAGAAAGTATATGGCAGTATGTGCTCATTCTGGCGACACTTCGAG  
ATCTGAGACTTTTGCTAAAGGTGCAACTGAGCAGATTCTTGACGTTCCACGAAATACTACGACTCTAAAGGTGAGGTAAAGCAACTTAGTGAC  
GAAGTAAGAGACGAAATCAACCAGAGATCCAACACTTTGGCGGGAGAAGGGTTGAGAGTTTTGGCCTTGGCCAACAATACGCAAAAAGTTCGG  
TGACGAGAAACATATCGAGAGTGAACCTACCGATTAAATTTTTGCGGGTTGATAGGAATGAAAGATCCTCCCCGTCTAATGTGAGCAAATCGG  
TTGCACGTCTCATGAAGGGTGGAGTACATGTGATTATGATTACTGGTGATTCTCCAAGCACAGCTAAGAACATTGCCAAGCAGATTGGAATGCCA  
TTACATACCAACGATTCTGTTCATGACCGGCGACCAACTCGACAAGTTATCCCCGAAGCACTTTTGAATGCAATCCACAACGTTTCGGTGTTTGC  
TAGAACCCTCCAGAGCACAAAGTCTTGATTGTCAAGGCGCTTCAGGCTAGAGGTGATATCGTCGCCATGACTGGAGACGGAGTCAATGATGC  
CCCAGCATTAAAGCTCGCCGATATTGGAATTGCCATGGGAAAAAATGGAACCGATGTTGCCAAAGAAGCAGCCGATATGGTGTTGACGGATGAC  
GATTTCTCTACGATTTTGAATGCGATCGAAGAGGGTAAAGGTATTTTCTTCAACATTCAAACCTTTATCACTTTCCAGTTATCCACCTCGATTGCC  
GCGTTGACGTTGATTGCTCTCGCTACGTTCTTTGGACTTCCAAACCCTTTGAATGCTATGCAAATTTTGTGGATCAATATCTTGATGGATGGCCCT  
CCCGCCAGTCGCTCGGAGTTGAACCCGTTGATCATGAGGTGATGAACAAGCCTCCAGAAAGAGAAACGACAAAATCTTGACCAAAGCTGT  
GATCAAGCGTGTTTTACAATCTGCCACTATGATTATCTTGGTACGCTTCACATCTTTGTCAAAGAAAGAATTGATAATGAGGTGACTGCCAGAG  
ATACCACCATGACTTTACCTGTTTTGTAATGTACGACATGTTCAATGCTTTGGCATGCCGTCACCAAACCAAGTCTATCTTTGAACTCGGACTTA  
AAAACCAAATGTTCAATTTTGGCGTGGCCGGATCACTTCTTGGTCAATTGTGTGCCATTTATGTGCCATTTTCCAGTCTGTCTTCCAAACCGAG  
GCATTGTACTTATCAGATCTTGGAAGCCTTTTCTTGTGACCAGCAGTGATTTTTAGTTGACGAGGCAAGAAAGTGGTATAAGAGAAGGCAGTT  
TACGATGAATGGAGTCAGCTACAGCGTATAG

D\_103758

ATGGCTCCACAGAATCCAATAGAAAGGGCGCAAACAGCGTCCAAACATTTACAACCTACCCGGATCTACCTCGGATAATGAAGACAATATCAGTG  
TTTCATCAGCCACACCTCTCACAGATAATTCAGGATTAACCTCAGAAGTGTTAACGGAACCTTCACGATCCCAAATCGCTTCGCAAATTGCATGAA  
CTTGGTGGGATCAAACGTGTTACTGTATGGTCTTGAGACTAATTTGCTGAGTGGAATCGATACCCATAGAGATCTTAAACATAGAGAAGAATTGTT  
CGGAGAAAATAGAATACCGGTGAAAGCCCAGAAAAACTTCTTTTCGTTCTATGTTACGATGCCATGAAAGACAAGGTGTTGATCATGTTGACTGTG  
GCTGCGGTTATATCCTTAGCATTGGGCTTATATGAGACCTTTGGTGAAGGTCTTTGAGGGACGATGAGGGCAAAGTTTTGCCCAAGGTGGACT  
GGGTGGAAGGCGTGGCCATTATTACTGCCGTTGTAATTGTGGTGGTGGTGGTGCAGCCAATGATTATCAAAAAGAACGACAGTTTGCTCGTTT  
GAATGCCAAGAAAGAAGACCGCGAGTTGATCGTGGTAAGAGACGGAGCCCAGAAAATGATCTCCATTTACGACCTTTTGGTTCGGTGATATCATC  
AACTTGCAAACAGGTGATGTTGTTCTGCTGATGCCATCTTGATACTGGGAGACGTTGAATGTGACGAATCTGCTCTCACTGGTGAATCTCATAC  
CATTAGAAGAAACCCGCTGGCGAGGCTATGGATTTCTATGAGGCACAGCTTCCAACAGATGAAGATTTGGGCTCGTCTACCATCAAGTTCAAG  
GACCCTTATCTTATTTCTGGTGCAAAGGTGCTCGAAGGTTTGGGATATGGAATGGTCACTGCAGTTGGCCCCAATTCCATTCATGGAAGAACAAT  
GATGAGTCTTCACACCGACGCAGAAACAACCCCATGCAAGTTAGACTCGACAACCTTGCCGAGGGAATCTCCAAGTACGGTTTTTTGGCCGC  
ATTGGTCTTTTTCATCGTTTTTGTTCATCCGCTATTGTGTCAATATTGCTCCAGGAGGAAAATTCAACGATATTCCTGGTCCGCAAAAGGGAAAAG  
AGTTCTTGGACATTTTGATTACTGCTATAACAATTATTGTCGTTGCGGTTCCCGAAGGTTTGCCATTGGCAGTGACTTTAGCGTTGGCTTTCCGCA  
CTACTAGAATGGCTCAGAACGGTAATTTGGTCCGTGTGTTGAAGTCATGTGAGACCATGGGTGGTGCTACCGCTGTGTGCTCTGACAAAACCGG  
AACTTTGACTGAAAATCGTATGAGAGTCGTGAGAGCATATTTGGACTGTCCGAGTTTGACGATACTTCTGGTGGCCATGGTCCATTGTCTTCAG  
AAGTGGTGAATGAACTTTCAGAAGAACTTAAGGTCTTTCTTTGTACCAACATCACTTTAAATTCCACTGCATTTGAGAACACCGACTACGACGA  
GAAGAAAGCTCTTATGGCAAGACAAAAACCAAGAGAAAGTCATTTATCCGCCAATTGATGCAAAAACCCCGGAAAGAAACAACAAGAACGAC  
AGGTTGAGCTTGAGTGGAACCGAACCTTATTTGGGAAACAAGACGGAATCTGCCTTGTTGATCCTTGCTAACAAAGTTTTCAATCAGTTTGC  
AACAGACAACCTTGAGACCCAGCGGAGCGCAACCACGACAAGATAGTACAGATCATCCAGTTTGAAAGTTCGAGAAAATGGGCTGGAATAG  
TAATGAAGATAGACAATGGGTTCCGTCTTTACGCTAAGGGAGCGGCTGAAATTGTTTTCAAGAATTGTGGGTACCTAACCAATGTGATGGTACT  
ACGGTGTCCATGGATCGGTCACAGAGAGACGACGCTTTCAGCAAGATTGATGAGTATGCCAATGATGCTTTGAGAGCCATTGCACTTGCTCACC

GCGACTTCATTGGAATTTCCAACCTGGCCTCCACCAGAACTTTTAGAGGAAAACCTCCAAACAAGCCGACCCCTAAGAACTTCTTGCTGTAGGATC  
 CACTATTCAGAAAGACCAAGACACTTGGTTTTGGATGGAATTGCAGGTATTCAAGATCCGTTGAAAGACGGTGTGGCACAAGCAGTTCTTCA  
 GTGTAAGGAAGCTGGTGTCACTGTTAGAATGGTTACCGGAGACAACTTGAATACTGCAAAATCCATCTCCAGAGCATGCCATATTCTTACTCCTG  
 ATGATCTTTCGAATGACTACGCATACATGGAAGGACCAACCTTCCGCAAGTTGACGGATGCGGAAAGAACGCGGATTGCGCCTCGTTTGAAAGT  
 ATTGGCGAGATCTTCTCCAGAAGATAAACGGGTTCTTGTGGAACATTGAAGAAAGCAGGAGAGGTTGTTGCTGTCACGGGTGACGGTACAAA  
 CGATGCTCCTGCCTTAAAGTTGGCAGACGTGGGATTTTCTATGGGAATTGCTGGTACTGAAGTGGCCAGAGAAGCCTCTGATATTATCTTGATGA  
 CAGACGATTTACCGATATTGTCCAGGCCATCAAATGGGGAAGAAGTGTTCGACTTCGATCAAGAAATTCATCCAGTTTCAGTTGACCGTCAAT  
 ATTACTGCCTGTATCTTGACGTTTGTGTCCGCTGTGGCATCTTCCAATGGCCAGTCGGTGTGACTGCTGTGCAGTTGTTGTGGGTGAATCTTATC  
 ATGGACACTTTAGCGGCGTTGGCGTTGGCGACCGATAAGCCAGACGACTCGTTTTTGAAGAAAAAGCCTGCTGGTCGTAAGTCTCCTTTGATTT  
 CGGTTTCGATGTGGAAGATGATACTTGGACAGTCAGTCACTCAGTTGGTTATCACGTTTCTTCTTCAATTTCTGTGGCAGAAGATTTTCCATGGC  
 AATAATCACATCGACAACCATCAGAACAAGCAATTGGACGCCATGACTTTTAACACATTGTGTGGTTGCAGTTCTGGAAATTGGTCGTCACGA  
 GAAAGTTGGACGAAGCAGATGGCATTGCAAAGGTTCCGGACAGACTCACGGCCAACAACCTGAACTTTTTTCAACACTTGTTCGCAATTGGT  
 ACTTTTTGGGAATTGCTCTTCTCATCGGCGCAATGCAAGTATTGATTATGTTTCGTCGGTGGTGTGCTGCATTACGCGTTGTTAGACAGACCCCTGGT  
 CAATGGGCTACTGCAATCATCTGTGGATTTATATCGATTCCCGTCGGATTGGTCATAAGAATAATCCCTGATCACTGGGTGGTGGCCATTTCCCA  
 ACCAGAGCCTTCAAGATCTTTATTTATTACGCTGGGTTTTCTGTTTTTGAAACGTAAGAAGAAGGAGGATCTTGAGAAAGCTGAACACGATGACC  
 TTAATGACACTAAGATGTCGGACTTGTCCGCACAATCATGA

D\_101154 ATGTCGATCCCCAACCCCGTCAGCTCGGTGTCCAAGGTTTACACGGATGTTTTAGCTTCGAAACCACAGTCGTAAGTGGGATTATGAAAACATAAA  
 TATCAAATGGAACCTCGCAAGACAACCTACGAAATCATCAAAAAGTTGGGACGTGGAAAGTATTTCGGAGGTTTTTTTAGGAGTGGATCTTAAAAA  
 AGGTGAAAAATGCGTTATAAAAGTGTGAAACCGGTCAAAAAGAAAGAAGATCAAGAGAGAAATTTCCATTTTGAAGAACTTGGACGGCCCCA  
 ATATCATTGGGCTTTTTGATATTGTAAGAGAACCCAGCTGAAAACACCCGGACTCATCTTTGAGCACGTCAACAACATCGACTTTCGCACCCTC  
 TACCAGTCTTTCACCGACTATGACATTTCGTTCTACATGTACGAATTGTTGCGAGCGTTGGACTACTCGCACTCGATGGGGATCATGCACCGTGA  
 CGTCAAGCCCCACAATGTTATGATAGACCACGAGAAGAACTTTTGCGGTTAATTGACTGGGGTTTAGCCGAATATTACCATCCAGGAACCGAAT  
 ACAATGTGCGAGTTGCATCGCGGTATTTCAAGGGACCGGAATTGCTCGTGGATTTCCGCTCTACGATTACTCTCTTGACTTGTGGTCGTTCCGG  
 TGCATGTTGGCGTCAATGGTTTTTCAAGAAAGAACCCTTTTTCCACGGAAAATCGAACACCGACCAATTGGTGCAAATTGTGCGTGTGTTGGGAT  
 CGGACGACCTACACAAATATTTGCAGAAATACGGGCTTGTTTTTGAGCGAGGAGTACGAAGATTTGGGATACTACAATAGAAGACCTTGAAGCG  
 ATTTGTCAACGAGAACAACCGCATCTTGTCAAGTACGAGTTTCTTGATTTTCATCGACAAGTTGTTACGCTACGACCACCAGGAGAGATTGACG  
 GCCAAAGAGGCTATGGCACATCCGTACTTTGACCCAGTACGGCCCAAGTAA

D\_103937 ATGGTTTTGCCTCACGAGCCCGAATTTCAACAAGCTTACAACGAATTGGTTTTCCGCTTTGGAGGAATCCACCTTGTTCCTCAAGAACACCCTCACT  
 ACAAGAAGGTGATTCCTGTTGTTTCAGTTCCCGAAAGAATTATTCAATTCAGAGTTTCATGGGAAAATGACAAGGGAGAAATCGAGGTGAACA  
 ATGGTTTCAGAGTCCAATTCAACTCGGCTCTTGGTCTTACAAGGGAGGATTGAGATTCCACCCAACCGTCAACTTGTTCGGTGTGAAATTTTT  
 GGGATTTGAACAAATTTTCAAAAATGCCTTGACCGGTCTCTCCATGGGTGGAGGTAAAGGTGGATGTGACTTCAACCCCAAGGGAAGAAGTGA  
 CGCTGAAATTAGAAGATTCTGTGTTGCTTTCATGAGACAATTGGCCAGATACATTGGTGCCGACAGAGATGTTCCCTGCTGGAGACATTGGTGTG  
 GTGGTCGTGAAGTTGGTTACTTGTTCGGTGCCTACAAGCAAATGCAAAAACAACTGGTCCGGTGTTTTTGACCGGTAAAGGGTTTGAGCTGGGGTG  
 GTTCTTTGATCCGTCCTGAAGCCACCGGTTACGGTACTGTCTACTATGTGGAGAAGATGATTGAAAAGGCCACTGGTGGAAAGGAGACTTTCAA  
 GGGTAAGCGTGTGTCATTTCTGGTTCTGGTAACGTTGCCAATACGCTGCTTTGAAGGTTATCGAATTGGGAGGAACTGTGGTTTCTTTGTCTG  
 ATTCTAAGGGAGCTCTCATTTCACAATCTGGTATTGTGCCTGAGCAGGTTGAGGCCATTGCTGCCGCTAAGCTCAAGTTCAGTTCATTGGAAGA  
 AATCTGCAAGAATCTGCTTCCATTTTCTCGGGCAAAACCGAGTACATTGCCGGTGTCCGTCCATGGACCAAGGTTGGTCAAGTTGACGTAGCA  
 TTGCCATGTGCCACCCAAAACGAAGTCAGCGGTGACGAAGCTAAGGCTTTGGTTGACGCTGGATGCAAGTACATTGCTGAAGGTTCCAATATG

GGATCCACCGTCGAGGCTATCGACGTCTTCGAGGCTAACAGATCCAAGAATGTTTGGTATGCTCCAGGTAAGGCCGCCAACTGTGGTGGTGTG  
 CCGTTTCTGGTTTGGAAATGGCCAAAACCTCTCAAAGAGTTTCTGGAAGTCTGAACAAGTTGACGAAAAGTTAAAGAACATCATGTACACCT  
 GTTTCGAGAACTGCTACAACACTGCTATCAAGTACTCTACCGAGAAGAGTGCTTCTGGCTTGCCATCTTTGTTGCAGGGTGCTAACATTGCTGGT  
 TTCATCAAGGTTGCCGATGCCATGTTTGACCAGGGTGAGGTGTTTTAG  
 D\_102983 ATGTCCCCTTTTCTAGCGTCGAAATTCGCCAAGACGGCCCTTGCAACGACGGCCGTTATTGGTGGTCTGTTGTGTACGTGGACTACATCAAACC  
 ACCCGCAGTGCCTGAGTTGGTCACTTCGTACAAACCTTTAAGAAAAGATTGCTGCTCCTCCAAAGAGAGAAGAGCTCGTTTCTCGGTTGGA  
 AACCACCCCCAAATTCGATGTTCTTGTGATTGGAGGTGGTGCCGTGGGAACTGGTACCGCGTTGGATGCTGCTACAAGAGGCCTCAATGTTTGT  
 TTGTTGGAAAAAACCGATTTTTCTTCGGGTACTTCTTCAAATCTACAAAAATGGCCCATGGTGGTGTGAGATATTGGAAAAAGCCATTTCCA  
 GCTCTCTAAAGCCCAGTTGGACTTGGTTATCGAGGCGCTTAACGAAAGAGCAAACATGTTGCGCACGGCTCCTCACTTGTGTTCCGTTTTGCC  
 ATCATGATCCCCGTCTACAAGTGGTGGAAAGTGCCTTATTTCTTCATGGGTTGCAAAATGTACGATTGGTTTGCCGGTCACCAGAACTTGCGGTC  
 GTCCACTGTTTTCTCCAGAGAAATGACCGCTGCCATTGCTCCTATGATCGACGATTCCAACCTGAAAGCTGCATGTGTGTACCACGACGGAACCT  
 TCAACGATGCCCGTATGAATGCTACTTTGGCCATCACTGCCGTGAGCATGGTGCCACCGTTCTCAACTACTTTGACGTGGTCCAGCTCGTGAA  
 AAATGAAGGCAAAAATCGAAGGTGTGCGTGCTGTGACAGAGAAACCGGTAAAGAGCATCTCATCAAGGCTACTGCTGTGGTGAATGCCACCG  
 GTCCTATGGCTGACAAGATTTTGGAAATGGACGAAGATCCTCAGGGCTTGCTCCAAAGATCCCACAACCACCAAGAATGGTTGTTCCCTTCGTC  
 TGGTGTCCATGTCGTTCTTCCTGAATACTACTGTCCAAGAGATATGGGAATGTTAGACCCATCCACCTCCGATGGTAGAGTCATGTTTTTTTGGC  
 ATGGCAAGGAAAGGTCTTGGCTGGTACTACCGACACCCCATGAAGTCTGTCTCCGAAAACCCAGTCCCATCCGAAGAAGAAATTCAAGATAT  
 CTTGAACGAATTGTCCAAGTACATTGTTTTCCCTGTGCATAGAGAAGATGTGTTGTCTGCCTGGTCTGGTATCAGACCATTGGTTTCGTGACCCTT  
 CCACTGTCCCCAAGGGTCAAGACCCACCACCGCTTCTACCCAAGGCCTTGTTTCGTTCCCATTAATCACCCAGTCTGAAACAGGATTGGTGAC  
 GATTTCTGGAGGAAAATGGACCACTTACCGTGAAATGGCTGAAGAAACCGTTACT  
 D\_102964 ATGACTACCACTCCTTACTCTATTCCAAAGCCATTTAAAGTTTGCATTATCGGTTCCGGTAATTGGGGAACCTGCTGTGGCCAAGTTGGTGGCAGA  
 GAACACTGCAGAAAAACCACAAATCTTTGAAAAAATGTTCAAATGTGGGTTTTTGAAGAACAATCGAGGGTAAAAATCTTACTTCCATTATC  
 AATGAACAACATGAAAATGTCAAATACTTGCCCGGAATCAAGCTTCCTGAAAACCTGATTGCTAATCCTGATGTGGTATCCACTGTGGAAGGCG  
 CTGACCTTTTGGTGTTCACATTCCTCATCAATTTCTTCCTCGTGTTTGAAGCAATTGGTGGGTAAAGTTTCTCCAAATGCCCGTGCCATCAGTT  
 GTCTTAAGGGTCTCGAGGTAACTCTGAGGGATGCAAATTGTTATCCCAATCCATCACTGACACTTTGGGAATATACTGTGGTGTATTGAGTGGA  
 GCCAACATTGCTACTGAAGTTGCCAAGGAACGTTGGTCGGAACACCATTGCATACTGTGTTCCCTCCTGACTTCCGTGGAGCCGGTCACGACG  
 TAGACGAATACGTTTTGAAGCAATTGTTCCACAGAACATATTTCCATGTTAGAGTGATTGAGGATGTTGCTGGTGCTTCCATAGCCGGAGCATTG  
 AAAAATGTTGTTGCTATTGCTGCTGGTTTTCGTCGAGGGTGCCGGCTGGGGAGACAATGCCAAGGCTGCGGTGATGAGAATAGGACTCAAGGAG  
 ATTATTCACTTTGCTTCTTACTACAAGAAGTTTGAATCAAGGCTCTTGTGGACCCTCAATCCACCACATTTACCGAAGAAAAGTGCCGGTGTGTC  
 CGACTTGATCACCACTGTTCCGGTGGTAGAAACGTCAAGGTTGCCCGTTACATGATCGAGCACAAGGTGGATGCTTGGGAAGCCGAAAAGAC  
 TTTGCTCAATGGTCAATCATCGCAAGGTATTTTGACCGCAAAAGAGGTGCACGAATTGTTGGAAAACCTACGACTTGAAAACAAGAGTTTCCTTTG  
 TTCGAGGCCACATACAAGGTGATCTACGAGAACACCGATGTCAACGACTTTCCAACGGTGTGGAAGCCGACGATTAA  
 D\_103937 ATGGTTTTGCCTCACGAGCCCGAATTTCAACAAGCTTACAACGAATTGGTTTTCCGCTTTGGAGGAATCCACCTTGTTCGAAGAACCCTCACT  
 ACAAGAAGGTGATTCCTGTTGTTTCAGTTCCCGAAAGAATTATTCAATTCAGAGTTTCATGGGAAAATGACAAGGGAGAAATCGAGGTGAACA  
 ATGGTTTCAGAGTCCAATTCAACTCGGCTCTTGGTCTTACAAGGGAGGATTGAGATTCCACCCAACCGTCAACTTGTCCGGTGTGAAATTTTT  
 GGGATTTGAACAAATTTTCAAAAATGCCTTGACCGGTCTCTCCATGGGTGGAGGTAAAGGTGGATGTGACTTCAACCCCAAGGGAAGAAGTGA  
 CGCTGAAATTAGAAGATTCTGTGTTGCTTTCATGAGACAATTGGCCAGATACATTGGTGCCGACAGAGATGTTCTGCTGGAGACATTGGTGTG  
 GTGGTCGTGAAGTTGGTTACTTGTTCGGTGCCTACAAGCAAATGCAAAACAACCTGGTCCGGTGTTTTGACCGGTAAGGGTTTGAGCTGGGGTG  
 GTTCTTTGATCCGTCCTGAAGCCACCGGTTACGGTACTGTCTACTATGTGGAGAAGATGATTGAAAAGGCCACTGGTGGAAAGGAGACTTTCAA

GGGTAAGCGTGTTGCCATTTCTGGTTCTGGTAACGTTGCCAATACGCTGCTTTGAAGGTTATCGAATTGGGAGGAACTGTGGTTTCTTTGTCTG  
 ATTCTAAGGGAGCTCTCATTTCACAATCTGGTATTGTGCCTGAGCAGGTTGAGGCCATTGCTGCCGCTAAGCTCAAGTTCAGTCATTGGAAGA  
 AATCTGCAAAGAATCTGCTTCCATTTTCTCGGGCAAACCGAGTACATTGCCGGTGTCCGTCCATGGACCAAGGTTGGTCAAGTTGACGTAGCA  
 TTGCCATGTGCCACCCAAAACGAAGTCAGCGGTGACGAAGCTAAGGCTTTGGTTGACGCTGGATGCAAGTACATTGCTGAAGGTTCCAATATG  
 GGATCCACCGTCGAGGCTATCGACGTCTTCGAGGCTAACAGATCCAAGAATGTTTGGTATGCTCCAGGTAAGGCCGCCAACTGTGGTGGTGGT  
 CCGTTTCTGGTTTGGAAATGGCCAAAACCTCTCAAAGAGTTTCTGACTTCTGAACAAGTTGACGAAAAGTTAAAGAACATCATGTACACCT  
 GTTTCGAGAACTGCTACAACACTGCTATCAAGTACTCTACCGAGAAGAGTGCTTCTGGCTTGCCATCTTTGTTGCAGGGTGCTAACATTGCTGGT  
 TTCATCAAGGTTGCCGATGCCATGTTTGACCAGGGTGAGGTGTTTTAG

D\_103507 ATGTCCGAAATAAACTTCACTCCACTTAAAAACACCAAGGTTTTCCAGCCGATTCAAGTTGGAAAAAACCTCCTTTCCAACCGAATTTTTTATGC  
 CCCCTCCACAAGAACCAGAGCATTGGACGATCGGACTCCTTCGAAGTTGCAATTGCGCAACTACGACGAAAGAACAAGTATGCTGGTTTCGCT  
 TGTGGTCACCGAAGCCACTTTTTTCATTTCTCAGGCCGGAACCATGGCAGGAGTTCCGGGAATATATACCCAGAACACACCAAAGGATGGAA  
 AAAAATTGTGGATAAGGTTACGAGAACAATTCGTTTATTGCAATTCAGCTTTGGAAGTTGGGTCGACTTGATAACCCCAAAGATTTGAAGGCA  
 GTAGGCTTACCCTACTTGGCACCTTCAGCCATTTATCCCGACAAAGATGCTCGGGAAGAAGCCGAGGCTGCGAATAATCCTATTAGAGCATTGAC  
 CGAAGAGGAAATCCACAACCAGATTTATGTGGAATACACCACGGCTGCAAAAAATGCCGTTGAGGCTGGGTTTCGACTACTTGGAGTTACATGG  
 TGCTCACGGCTACTTGTGTCACCAATTCTTGGAAGATACCTCCAACCAAAGGACAGACAAGTATGGTGGATCGGTAGAGAACAGAGCCAGGTT  
 TGTGTTGGAGCTCATTGACCATCTTATTCCTATAGTTGGTGCTGACAACTTGCTATTCTGCTTTCTCCATGGGTGACTATTAAAGGTATGCCTGGT  
 ATTCATGGTGATACCCATCCATTGACCACCTACAGCTACTTGCTACACGAGCTTGAAAAACGGGCTAAAGCCGGGAATCGGTTAGCCTACATTTT  
 CATTGTAGAGCCTAGAGTCAATGGGTCTACTACTCTTGAAACCAAAGACCAAAGTGGAGACAATGGTTTTGTTGAAGATATTTGGAAGGGGAACC  
 ATTCTCAAGGCGGGAACTACACATATGATGCTCCAAAGTTCAATCTGGTGATTAAGACGTTGAAAACGACCGTACGTTAGTCGGGTTTCAGTC  
 GCTATTACGTCTCGAATCCAGACTTGTTTCAGCGATTGAAGGACGGAAATCCACTCAAGCCTTACGACCGTTCTCTCTTTTACCGAAAGGACGA  
 CTGGGGGTACAATACTTATCCATACGAGGGACAAACAGAAGAGGAAATAGAGGCTGCAAAAAACAGAAAGCCAAAGCCTATTGGGGCCAAGG  
 CATAA

D\_103508 ATGCTGGCAATTAAAGTTAAACCCCTCGGGGACACAAAGGTGTTTGAGCCTATACAGGTGGGAAAGAATACTCTTTCCAATAGACTTTTCATGT  
 GCCCAACTACAAGACTCAAGGCTTTAGAAGACGGTACTCCATCGAATTTGGCATTGCAACTCTATGACGAAAGAAGCAAGTTTCCCGGCTCGCT  
 CGTGACTACTGAAGGAACTTTCACTTATGAAGAGGGTCAAGTATGGGAAAGAAGTCCAGGAATTTATACTGAAAGACATATTGAAGCATGGAAA  
 AAAATTGTGATAAAAGTTCATGAAAACAAATCTTTTCATTTCACTCCAGTTGTTCAATTCGGGCCGTGTAGCCGACCCAACCATTCAGACAACA  
 AGAATCATCCATTTGTTGCTCCATCGGCTATTTACCATGATGAGGAAACGAAAAAGCTGCCATTGCTGCTGGCAATCCTTTGCGAGAATTAACC  
 TTGGATGAAATCCACGATATTATTAACAACAAGTACCCCAAAGCTGCCATAATGCTCTTAGAGCCGGGTTTCGACTATGTCGAAGTCCACGCTGC  
 AAACGGCTACCTTCCCAACCAATTTATTGACGTTGCCAGTAATCAGCGCACAGACCAATATGGCGGTTTCGATTGAAAATAGAGCCAGGTTTGTG  
 TTGGAAATCATTGACAAATTGACTGCTGAGATTGGTGCCGACAAGATTGGGCTCAGGATTTCTCCATGGTCGACATTCCAGGGCATGCTGACCA  
 AAGGTGCAGAGATCGATCCATTGACCACCTACAGTTACATTTTACACGAATTGGAAAAAAGAGCTCAGAAGGGAAATAGGTTGGCGTATGTGTC  
 CATTATCGAGCCTAGAGTTGATGGAACTCCACTGTCAAGAAAGAACACCAAGTTGGTGACAATTCGTTTGTCTACGATATTTGGAAGGGCACA  
 GTTTTGAGAGCGGGTGGATACACTTATGATGCCCCAGAATTCAAACGAGTTGAAACCGATCTTGCCAACGATAGAACAGTCATTGGTTTCTGTC  
 GTTACTATATCTCCAATCCAGATTTGGTTGAAAGGCTTAAAAATGGCTGGGATCTCCAACCATACGACAGGCCCTCTTTTTATAGAAGCGACGATT  
 ACCGCTACAATACCTATTCGTTCCATGGAGAGCCCCCTAGAGACGAGGAATCCGGCAAGAATAGAAAGCCTGAGCCAATTGCTGCTTAA

D\_103084 ATGTCTGACGTTCTGGCGAGCTACACAGAAGAAGGACTGCTAGTGGCTCACTCTATGGATCGGAAATAGATAGTTTCCATTCCGTAAGTCAAA  
 ACTCAAAATGGAAGAATCTCAGACAAAAATCATTACAATACTTAGAAAGTATGGGTGCTTTATAGGACCTGGTATCATGGTTTCAGTGGCATAT  
 ATGGACCCAGGTAAGTATGCCACAGGTATAACAGCTGGTGCCTCCAACAGATTCTCCCTTTTATTCATCGTTCTAATTTCCAATATCATTGCCATTT

TTCTTCAAAGTTTATGCATCAAGTTGGGCTCAGTAACCGGCTACGATCTTGCCCGTTGTTGTCGAGAATACCTTCCCAAGTGGCTCAATATCATTC  
TCTGGATCCTTGCGGAAAGTGCAATCATTGCAACTGATGTGGCTGAAGTTATAGGTTTACGCTATTGCCCTTAATATTCTTCTTAAAATTCCACTTC  
CAGCAGGCGTGGTAATTACAATAGTGGACGTTTTATTTGTGCTAATGGCGTATCGCAACGACACTTCCTCTACCAAGTTTGTCAAGATGTTTGAG  
TATGCAGTTGCTTGTCTTGTGGTGGCCGTGGTGGTTTGCTTCGCAGTGGAATTGCCCATTTACCAGTCACTTCAGAAATGGTTCGTGAGATCTT  
CAGAGGTTATGCTCCTTCGAAAGAAATGGTCCAGGGAAGTGGCTTGACCATTGCTACTGGTATCATTGGATCCACAGTTATGGTACACTCATTAT  
TTTTGGGTTCTGGTCTCGTTCAGCCTAGATTGAGAGAGTACGATGTAACCCACGGTCTTGTGGATCTTGATCTGGTATGTTCTGAGGACGAAACT  
ACAGCAGATACTGTCTCAGAAAAATCGTCTACCAGAGTTAAACTACTCGTATCGACAAAGAAGCTCTCTTCTTTTACAAGAGTTACAAACCAT  
CGTACCAATCAATTCAATACTCGTTGAAATACTCAATTATTGAACTTGTGGTTACGCTTTTCACATTTGCACTTTTCGTCAACTCGGCTATCTTGGT  
GGTGGCTGGAGTTACCCTCAACGATACCCCAAGAAGCCATCGATGCCGACTTGTACACTATTCATGCATTGCTCTCCAAAAATTTGGCACCTGTTG  
TAGGCACAGTTTTTCATGCTTGCCTTGTCTTTTCAGTGGTCAAAGTGCTGGTATCGTCTGTACTATTGCTGGACAAATGGTAAGTGAGGGCCATATC  
AATTGGAAGCTTAAACCATGGGTGAGAAGACTAGTGACAAGAGCCATCTCAATTATACCTTGTTTGGCCATTTCTGTTGGTATTGGACGGTCCGG  
TTTGGGACTCGCCTTGAACGTTTCACAGGTTGTGATTTCCATTCTTCTTCCCCCATTAAACGGCTCCTCTTATCTACTTTACATGCAAAAAGTCCAT  
CATGAAAGTGCCATTACCCAAGGAGATGCAGTCAGATGATGAAGACGAAGTAAAATACAAATATCTACACAACAATTGGCTCACATCCATCATT  
GTCTTTGCCATCTGGCTCTTTGTGCTGGCATTGAATATCTACGCGATTGTTGACATGGCCAAAAATGGTGTGGCCGGCAGTTAG

---

**Table S3 DEGs related to metabolism of *M. guilliermondii* A4 in “S1 vs S0” and “S2 vs S0” groups.**

| Description                          | Gene ID  | Annotation (Protein ID)                                       | log <sub>2</sub> FC |          |
|--------------------------------------|----------|---------------------------------------------------------------|---------------------|----------|
|                                      |          |                                                               | S1 vs S0            | S2 vs S0 |
| Sugar transportation and utilization | D_104547 | Hexose transporter 2 (P53387)                                 | 2.206               | 1.553    |
|                                      | D_102607 | High-affinity glucose transporter 1 (A0A1D8PCL1)              | 1.193               | —        |
|                                      | D_102333 | Probable glucose transporter rco-3 (Q92253)                   | 1.165               | —        |
|                                      | D_105325 | Sugar transporter STL1 (P39932)                               | -1.679              | —        |
|                                      | D_104687 | Low-affinity glucose transporter (P18631)                     | -2.410              | —        |
|                                      | D_104584 | Sugar transporter STL1 (P39932)                               | —                   | 1.218    |
|                                      | D_104023 | Sugar transporter STL1 (P39932)                               | —                   | -1.006   |
|                                      | D_105427 | Probable sucrose utilization protein SUC1 (P33181)            | —                   | -1.135   |
|                                      | D_100896 | Glucose transporter GlcP (A0A0H2VG78)                         | —                   | -1.313   |
|                                      | D_102664 | Sugar transport protein 12 (O65413)                           | —                   | -1.321   |
|                                      | D_102555 | Probable sucrose utilization protein SUC1 (P33181)            | —                   | -1.325   |
|                                      | D_104356 | Probable sucrose utilization protein SUC1 (P33181)            | —                   | -1.603   |
|                                      | D_103907 | Sugar transporter STL1 (P39932)                               | —                   | -1.811   |
|                                      | D_103142 | High-affinity glucose transporter HXT2 (P23585)               | —                   | -1.820   |
|                                      | D_102377 | Hexose transporter HXT8 (P40886)                              | —                   | -1.951   |
|                                      | D_103976 | Sugar transporter STL1 (P39932)                               | —                   | -2.750   |
|                                      | D_102554 | Maltose permease MAL31 (P38156)                               | —                   | -1.775   |
|                                      | D_105520 | Maltose permease MAL31 (P38156)                               | —                   | -1.961   |
|                                      | D_101515 | Maltose permease MAL61 (P15685)                               | —                   | -2.389   |
|                                      | D_100515 | Maltose permease MAL61 (P15685)                               | -1.557              | -3.716   |
|                                      | D_100514 | Maltose permease MAL61 (P15685)                               | -2.118              | -4.209   |
|                                      | D_100516 | Maltose permease MAL61 (P15685)                               | -2.193              | -6.957   |
| Cytochrome P450                      | D_101278 | Cytochrome P450 61 (P54781)                                   | 1.257               | 1.447    |
|                                      | D_105475 | Cytochrome P450 52A12 (Q9Y757)                                | -1.076              | —        |
|                                      | D_105324 | Cytochrome P450 52A12 (Q9Y757)                                | -1.470              | -1.555   |
|                                      | D_100696 | Cytochrome P450 regulator dap1 (O13995)                       | —                   | -1.017   |
|                                      | D_105529 | Cytochrome P450 52A12 (Q9Y757)                                | —                   | -1.052   |
|                                      | D_102610 | Cytochrome P450 52A13 (Q9Y758)                                | —                   | -1.068   |
| Others                               | D_102378 | Cytochrome P450 52A12 (Q9Y757)                                | —                   | -1.592   |
|                                      | D_104882 | NADH-ubiquinone oxidoreductase assembly factor N7BML (Q6C7L6) | —                   | 1.393    |

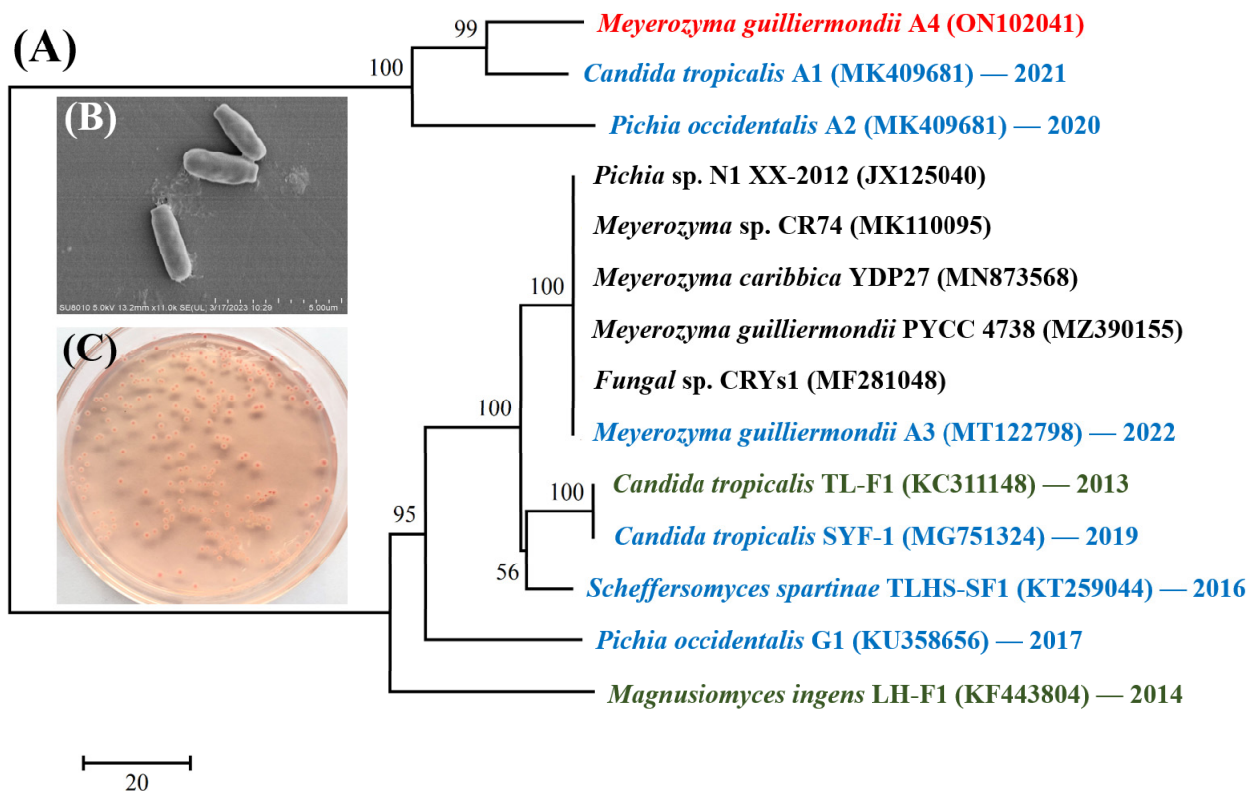

**Figure S1** *M. guilliermondii* A4: (A) phylogenetic tree (Neighbor-Joining method); (B) scanning electron microscopic (SEM) micrograph of cells; (C) colonies on solid agar plate. The yeasts which were highlighted in blue and green color were the ones we have isolated, researched and reported (in the year followed by the corresponding GenBank accession numbers). Those in green color were non-halotolerant yeasts and those in blue color were halotolerant ones.



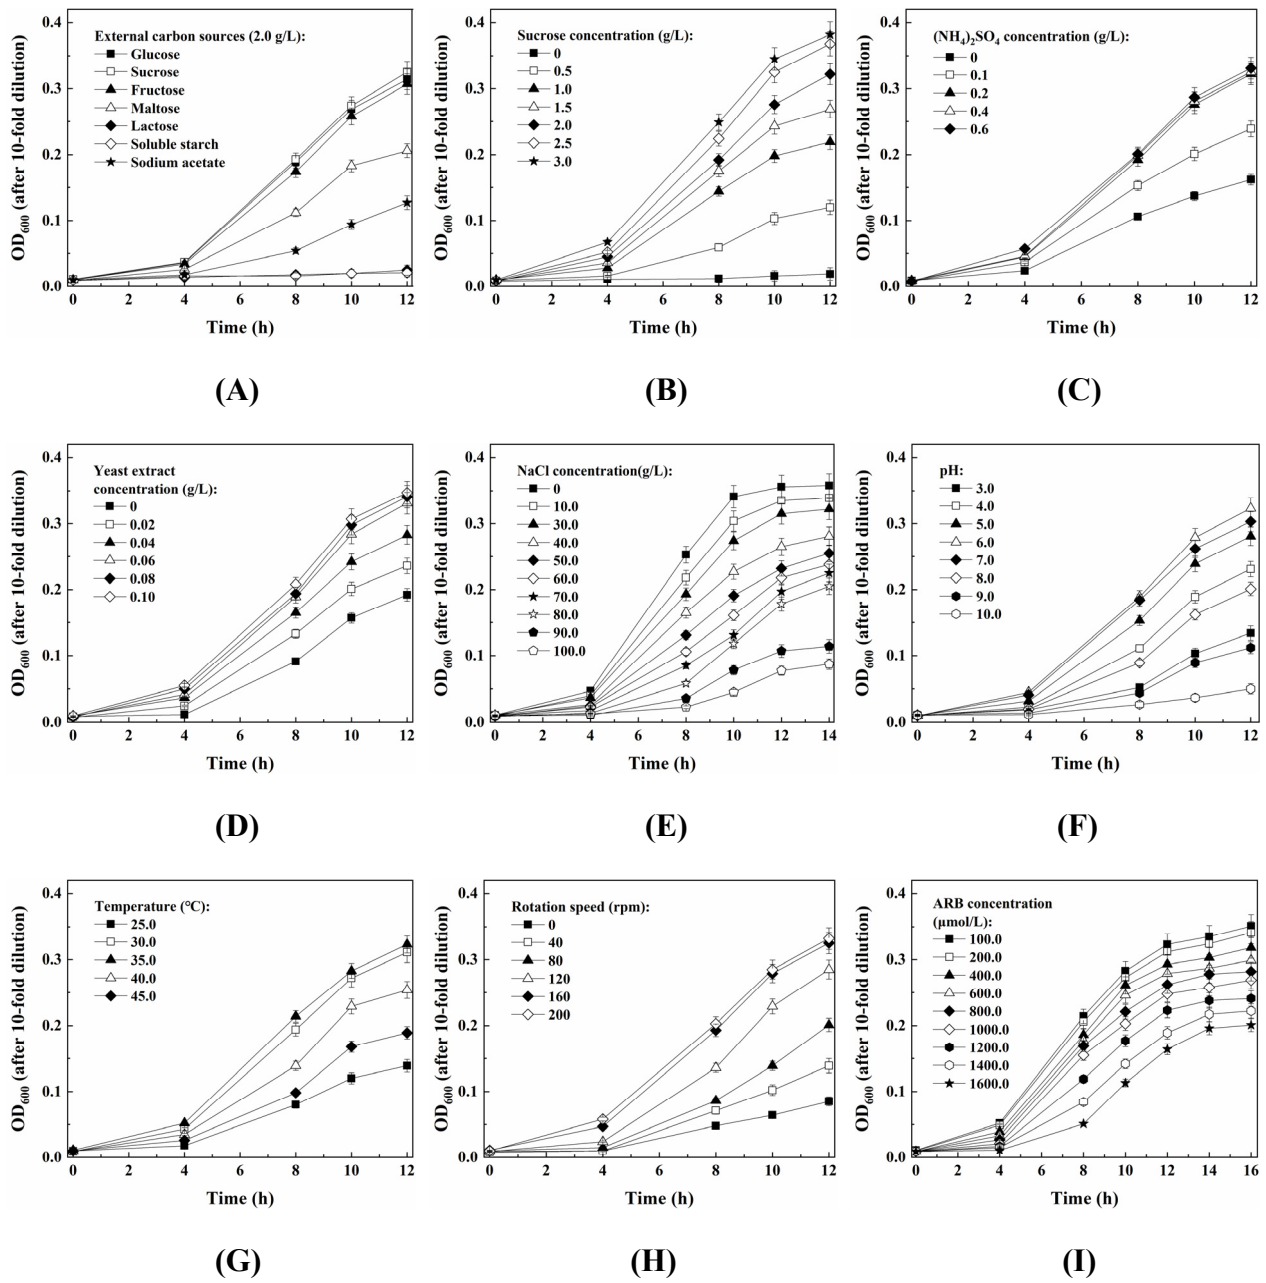

**Figure S2** Optimization of the conditions for cell growth of *M. guilliermondii* A4: (A) type of external carbon source (2.0 g/L); (B) sucrose concentration; (C) (NH<sub>4</sub>)<sub>2</sub>SO<sub>4</sub> concentration; (D) yeast extract concentration; (E) NaCl concentration; (F) pH; (G) temperature; (H) rotation speed; (I) ARB concentration.

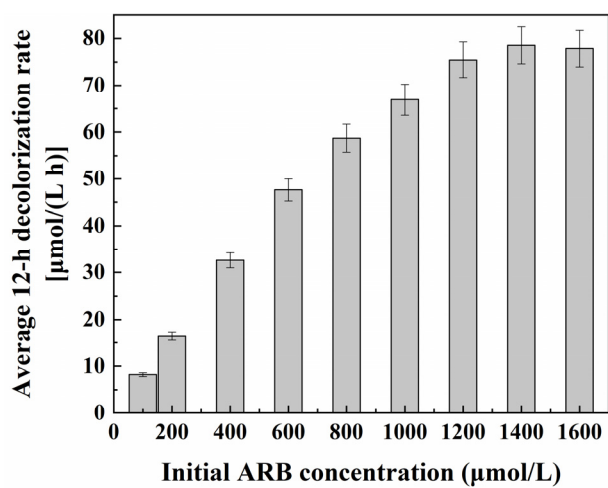

**Figure S3** Average 12-h decolorization rate of ARB of different initial concentration.

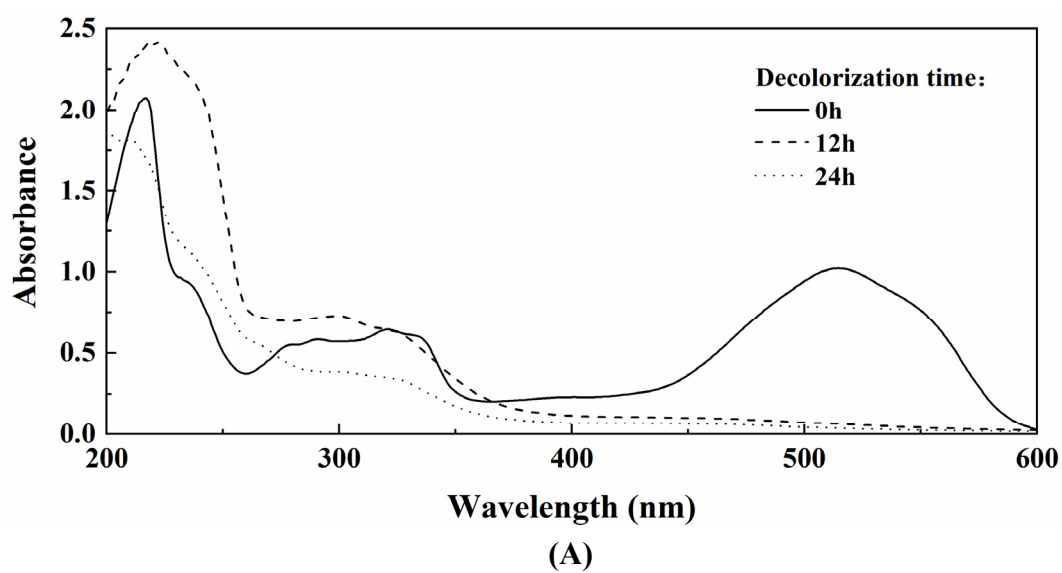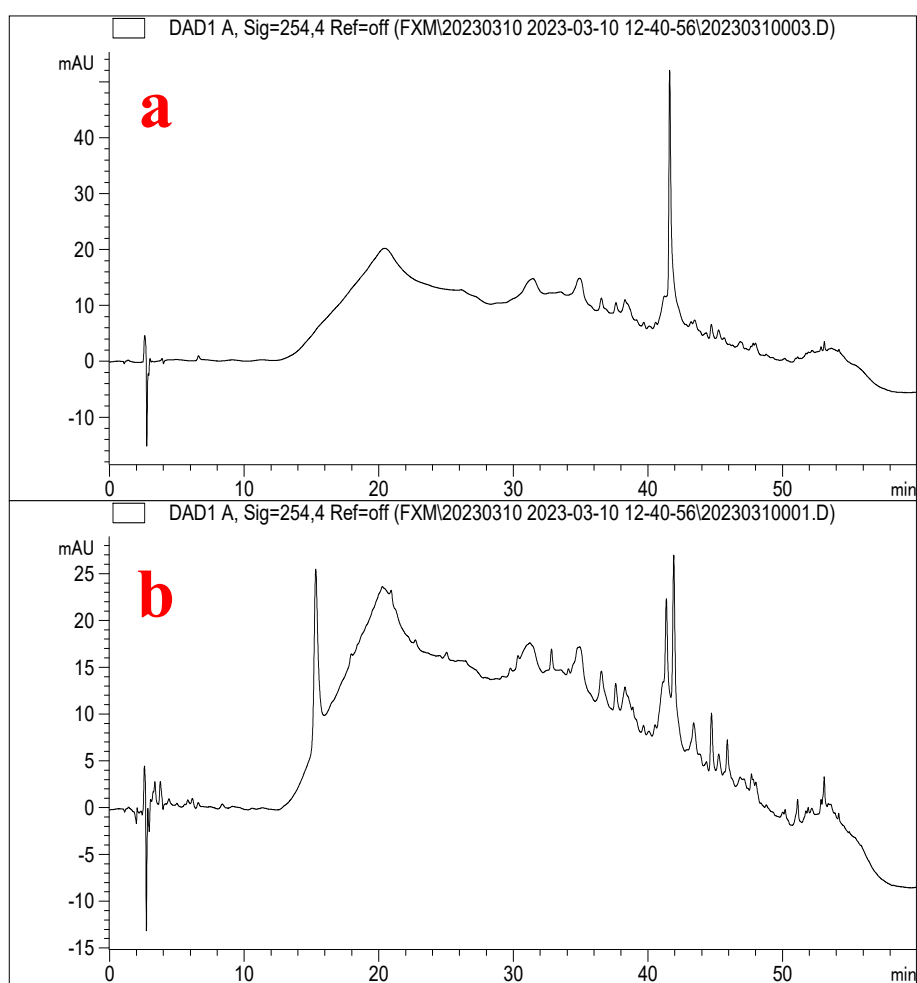

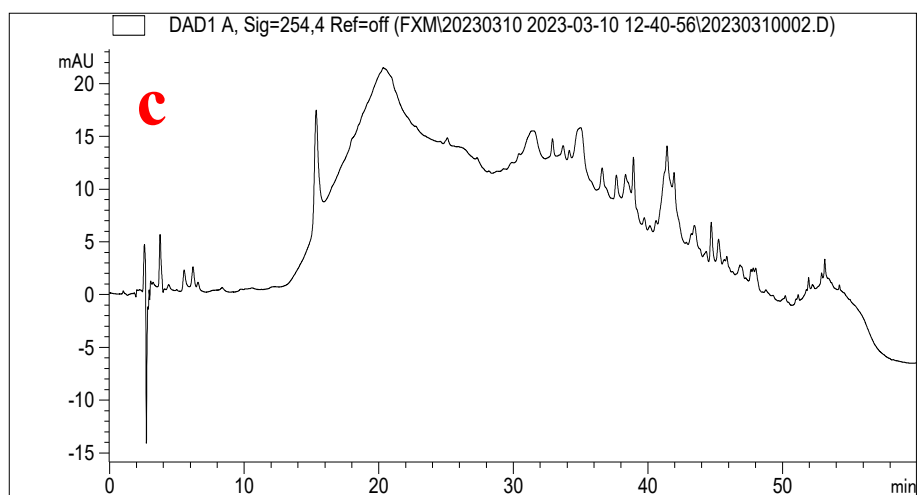

(B)

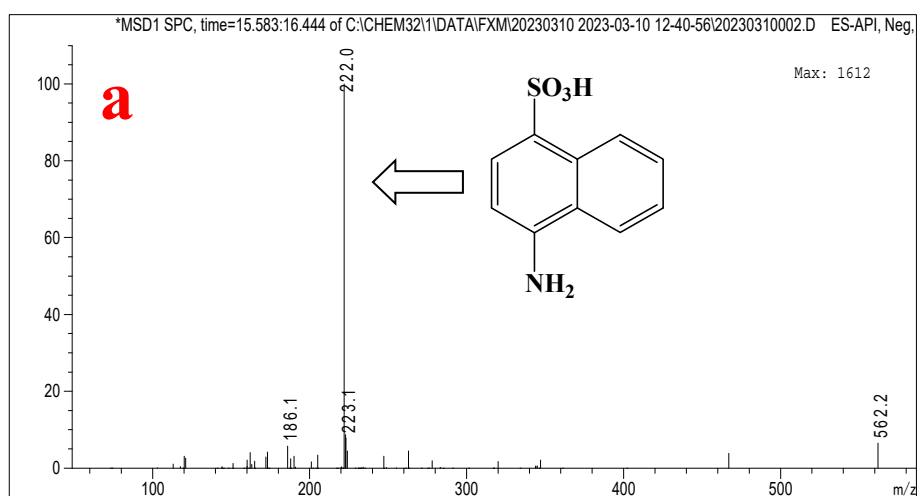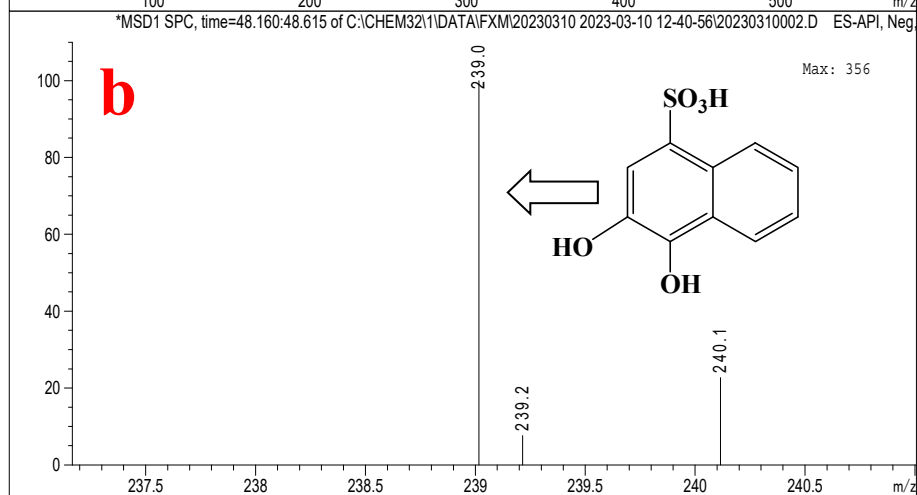

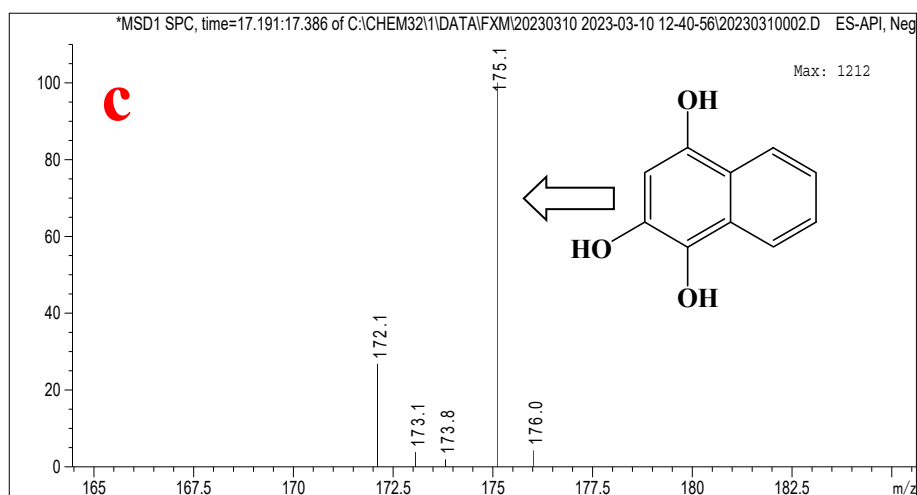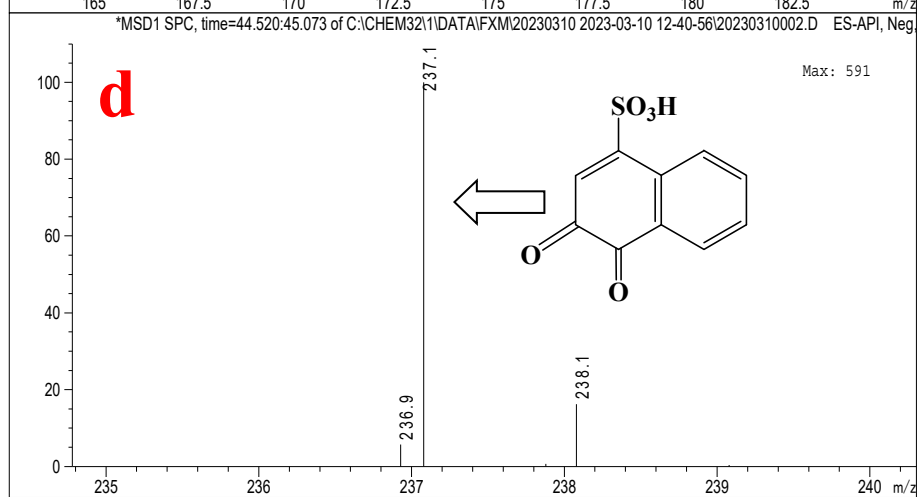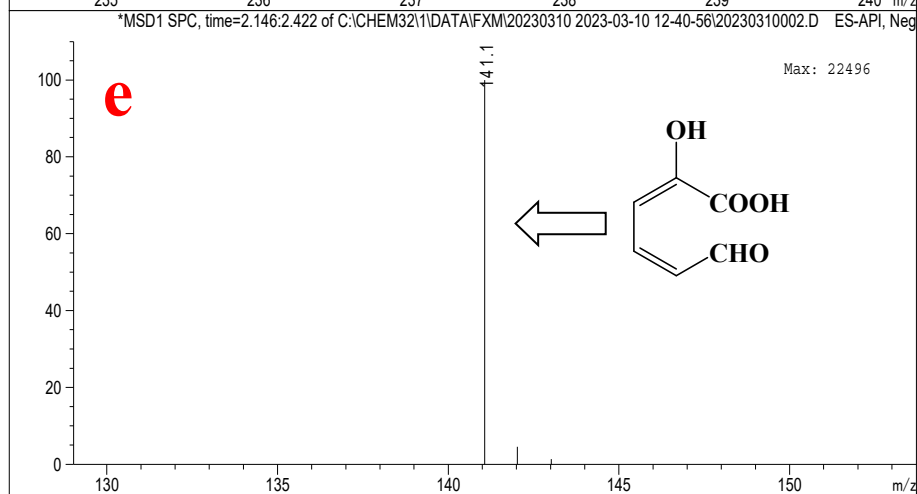

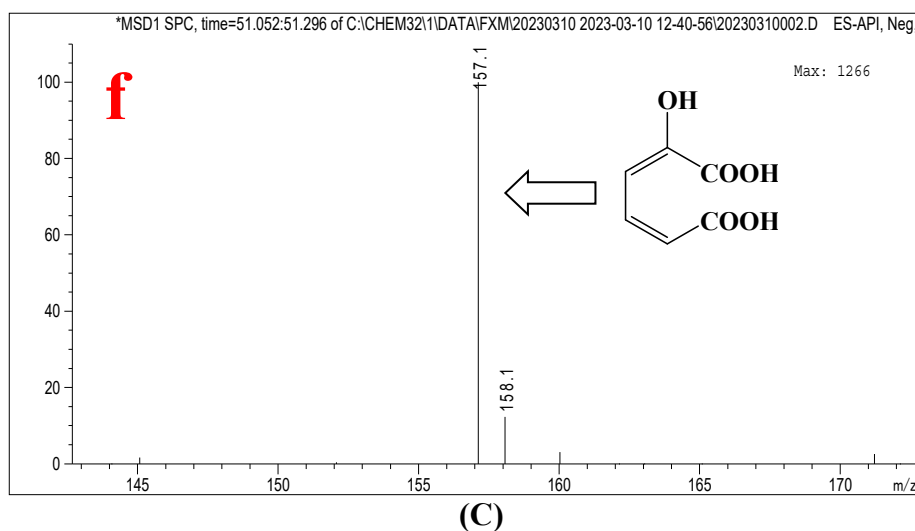

**Figure S4** (A) UV-Vis scanning spectrum of ARB before and after decolorization for 12 h and 24 h by *M. guilliermondii* A4. (B) HPLC spectrums of ARB (a) before and after decolorization for (b) 12 h and (c) 24 h. (C) MS of six possible decolorization intermediates: (a) 4-aminonaphthalene-1-sulfonic acid; (b) 3,4-dihydroxynaphthalene-1-sulfonic acid; (c) naphthalene-1,2,4-triol; (d) 3,4-dioxo-3,4-dihydronaphthalene-1-sulfonic acid; (e) (2*E*,4*Z*)-2-hydroxy-6-oxohexa-2,4-dienoic acid; (f) (2*E*,4*Z*)-2-hydroxyhexa-2,4-dienedioic acid.

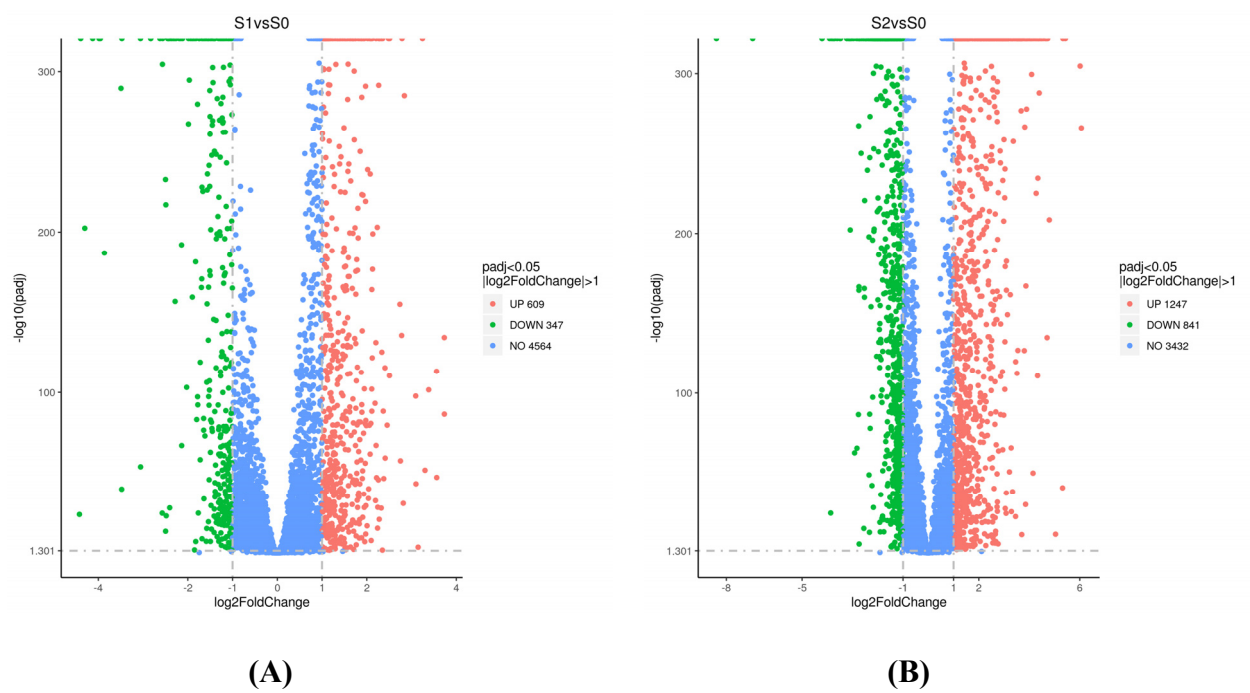

**Figure S5** Volcano map of DEGs in comparisons of (A) S1 and S0, (B) S2 and S0.

### **Text S1. Isolation and identification of halotolerant azo-dye-degrading yeast**

The pure yeast strain capable of decolorizing azo dye in brine was isolated from sea mud samples collected in Dalian, China (38.88 °N, 121.57 °E). Before yeast isolation, the sea mud microbial community was acclimated in 250 mL shaking flasks for continuous decolorization of different azo dyes (gradually increased from 40.0 µmol/L to 200.0 µmol/L) in the medium (100 mL) containing (g/L): sucrose 2.0, (NH<sub>4</sub>)<sub>2</sub>SO<sub>4</sub> 1.0, yeast extract 0.1, K<sub>2</sub>HPO<sub>4</sub> 1.0, MgSO<sub>4</sub>·7H<sub>2</sub>O 0.5 and NaCl 30.0. Other culture conditions were: temperature 35 °C, rotation speed 160 rpm, initial pH 6.0 and acclimatization time 36 d. Pure strains were isolated using spread-plate method on the agar (2.0%, w/v) medium plates containing (g/L): sucrose 2.0, (NH<sub>4</sub>)<sub>2</sub>SO<sub>4</sub> 1.0, yeast extract 0.1, K<sub>2</sub>HPO<sub>4</sub> 1.0, MgSO<sub>4</sub>·7H<sub>2</sub>O 0.5 and NaCl 30.0, as well as azo dye (µmol/L) 40.0. The strain with the highest decolorization efficiency was selected as the target yeast for further study. The target yeast strain was identified through 26S rDNA and Internal Transcribed Space (ITS) sequencing method which was performed by Sangon Biotech Co., Ltd. (Shanghai, China). Then a phylogenetic tree was constructed using Neighbor-joining (NJ) method by MEGA (Version 4.0) with 10,000 bootstrap replicates. Released 26S rDNA sequences of some yeast strains in GenBank database (<https://www.ncbi.nlm.nih.gov/genbank/>) which exhibited > 99% homology to the isolate according to the BLAST results and those of the yeasts which were have yet isolated and reported by us were chosen for constructing the phylogenetic tree. In addition, morphology observation of the yeast cells was performed with a field emission scanning electron microscope (Hitachi SU8010, Japan).



## **Text S2. Transcriptomics analysis**

### *S2.1. RNA isolation, cDNA library preparation and transcriptome sequencing*

RNA integrity was assessed using the RNA Nano 6000 Assay Kit of the Bioanalyzer 2100 system (Agilent Technologies, CA, USA). Total RNA was used as input material for the RNA sample preparations. Briefly, mRNA was purified from total RNA using poly-T oligo-attached magnetic beads. Fragmentation was carried out using divalent cations under elevated temperature in First Strand Synthesis Reaction Buffer (5X). First strand cDNA was synthesized using random hexamer primer and M-MuLV Reverse Transcriptase (RNase H-). Second strand cDNA synthesis was subsequently performed using DNA Polymerase I and RNase H. Remaining overhangs were converted into blunt ends via exonuclease/polymerase activities. After adenylation of 3' ends of DNA fragments, Adaptor with hairpin loop structure were ligated to prepare for hybridization. In order to select cDNA fragments of preferentially 370-420 bp in length, the library fragments were purified with AMPure XP system (Beckman Coulter, Beverly, USA). Then PCR was performed with Phusion High-Fidelity DNA polymerase, Universal PCR primers and Index (X) Primer. At last, PCR products were purified (AMPure XP system) and library quality was assessed on the Agilent Bioanalyzer 2100 system.

The clustering of the index-coded samples was performed on a cBot Cluster Generation System using TruSeq PE Cluster Kit v3-cBot-HS (Illumina Inc., USA) according to the manufacturer's instructions. After cluster generation, the library preparations were sequenced on an Illumina Novaseq platform and 150 bp paired-end reads were generated.

### *S2.2. Quality control and mapping of transcriptome sequencing results*

Raw data (raw reads) in the ".fastq" format were firstly processed through FASTQ software. In this step, clean data (clean reads) were obtained by removing reads containing adapter, reads containing ploy-N and low-quality reads from raw data. At the same time, Q20, Q30 and GC content the clean data were calculated. All the downstream analyses were based on the clean data with high quality.

The draft genome sequence of *Meyerozyma guilliermondii* A3 (with the accession ID of JAKFAP000000000) was referenced for mapping. Reference genome and gene model annotation files were downloaded from genome website directly. Index of the reference genome was built and paired-end clean reads were aligned to the reference genome using Hisat2 v2.0.5, because that this mapping tool can generate a database of splice junctions based on the gene model annotation file and thus can provide better mapping results than other non-splice mapping tools. The mapped reads of each sample were assembled by StringTie (v1.3.3b) (Pertea et al., 2015) in a reference-based approach. StringTie uses a novel network flow algorithm as well as an optional de novo assembly step to assemble and quantitate full-length transcripts representing multiple splice variants for each gene locus. FeatureCounts v1.5.0-p3 was used to count the reads numbers mapped to each gene. And then FPKM of each gene was calculated based on the length of the gene and reads count mapped to this gene. FPKM, expected number of Fragments Per Kilobase of transcript sequence per Millions base pairs sequenced, considers the effect of sequencing depth and gene length for the reads count at the same time, and is currently the most commonly used method for estimating gene expression levels.

### *S2.3. Analysis of differentially expressed genes (DEGs) and metabolic pathways*

Differential expression analysis of two conditions/groups (two biological replicates per condition) was performed using the DESeq2 R package (1.20.0). DESeq2 provide statistical routines for determining differential expression in digital gene expression data using a model based on the negative binomial distribution. The resulting *P*-values were adjusted using the approach by Benjamini and Hochberg (1995) for controlling the false discovery rate. Genes with an adjusted *P*-value  $\leq 0.05$  found by DESeq2 were assigned as differentially expressed. DEGs were identified as those with an FDR of  $<0.001$  and a RPKM (reads per kilobase of exon model per million mapped reads) ratio of the two samples of  $> 2$ . The fold change of DEGs was shown as the  $\log_2$  Fold Change ( $\log_2$  FC) of gene abundance via comparison of the SMF-stimulated sample and the control, and the screening criterion was  $\log_2$  FC  $\geq 1$ .

Gene Ontology (GO) enrichment analysis of differentially expressed genes was implemented by the clusterProfiler R package, in which gene length bias was corrected. GO terms with corrected  $P$ -value  $< 0.05$  were considered significantly enriched by differential expressed genes. KEGG is a database resource for understanding high-level functions and utilities of the biological system, such as the cell, the organism and the ecosystem, from molecular-level information, especially large-scale molecular datasets generated by genome sequencing and other high-through put experimental technologies (<http://www.genome.jp/kegg/>). We used clusterProfiler R package to test the statistical enrichment of differential expression genes in KEGG pathways.

#### *S2.4. Quantitative Real-Time PCR (QRT-PCR) validation*

In order to confirm the reliability of DEGs identified by RNA-Seq, genes with significant changes and related functions were validated through QRT-PCR by Sangon Biotech Co., Ltd., (Shanghai, China) according to the method described by Yong et al. (2013). Primers for QRT-PCR were designed according to their gene sequences according to the transcriptome sequencing results. QRT-PCR was performed using a LightCycler 480 instrument (Roche Diagnostics, Mannheim, Germany). The reaction measurements were performed in biological triplicate. The results were displayed relative to the expression levels of reference gene (18S rRNA) in each sample using the  $2^{-\Delta\Delta C_t}$  method according to the method described by Schmittgen and Livak (2008).

## References

- Benjamini, Y., Hochberg, Y., 1995. Controlling the false discovery rate: a practical and powerful approach to multiple testing. *J. Roy. Statist. Soc. Ser. B* 57, 289–300.
- Pertea, M., Pertea, G.M., Antonescu, C.M., Chang, T.C., Mendell, J.T., Salzberg, S.L., 2015. StringTie enables improved reconstruction of a transcriptome from RNA-seq reads. *Nat Biotechnol.* 33, 290–295. <https://doi.org/10.1038/nbt.3122>.
- Schmittgen, T.D., Livak, K.J., 2008. Analyzing real-time PCR data by the comparative CT method. *Nat. Protoc.* 3, 1101–1108. <https://doi.org/10.1038/nprot.2008.73>.
- Yong, X., Zhang, R., Zhang, N., Chen, Y., Huang, X., Zhao, J., Shen, Q., 2013. Development of a specific real-time PCR assay targeting the poly- $\gamma$ -glutamic acid synthesis gene, *pgsB*, for the quantification of *Bacillus amyloliquefaciens* in solid-state fermentation. *Bioresour. Technol.* 129, 477–484. <https://doi.org/10.1016/j.biortech.2012.11.092>.
